RESEARCH ARTICLE

# Comparative Transcriptome Analysis in the Hepatopancreas Tissue of Pacific White Shrimp *Litopenaeus vannamei* Fed Different Lipid Sources at Low Salinity

Ke Chen<sup>1</sup>, Erchao Li<sup>1\*</sup>, Zhixin Xu<sup>1</sup>, Tongyu Li<sup>1</sup>, Chang Xu<sup>1</sup>, Jian G. Qin<sup>2</sup>, Liqiao Chen<sup>1\*</sup>

**1** Laboratory of Aquaculture Nutrition and Environmental Health, School of Life Sciences, East China Normal University, Shanghai 200241, China, **2** School of Biological Sciences, Flinders University, Adelaide, SA 5001, Australia

\* [ecli@bio.ecnu.edu.cn](mailto:ecli@bio.ecnu.edu.cn) (ECL); [lqchen@bio.ecnu.edu.cn](mailto:lqchen@bio.ecnu.edu.cn) (LQC)

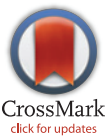

OPEN ACCESS

**Citation:** Chen K, Li E, Xu Z, Li T, Xu C, Qin JG, et al. (2015) Comparative Transcriptome Analysis in the Hepatopancreas Tissue of Pacific White Shrimp *Litopenaeus vannamei* Fed Different Lipid Sources at Low Salinity. PLoS ONE 10(12): e0144889. doi:10.1371/journal.pone.0144889

**Editor:** Peng Xu, Chinese Academy of Fishery Sciences, CHINA

**Received:** September 24, 2015

**Accepted:** November 24, 2015

**Published:** December 15, 2015

**Copyright:** © 2015 Chen et al. This is an open access article distributed under the terms of the [Creative Commons Attribution License](https://creativecommons.org/licenses/by/4.0/), which permits unrestricted use, distribution, and reproduction in any medium, provided the original author and source are credited.

**Data Availability Statement:** All relevant data are within the paper and its Supporting Information files.

**Funding:** This research was supported by grants from the National Natural Science Foundation of China (No. 31472291, 31172422), the Special Fund for Agro-scientific Research in the Public Interest (No. 201203065), and partly by the E-Institute of Shanghai Municipal Education Commission (No. E03009) and ECNU innovation fund. The funders had no role in study design, data collection and analysis, decision to publish, or preparation of the manuscript.

## Abstract

RNA-seq was used to compare the transcriptomic response of hepatopancreas in juvenile *Litopenaeus vannamei* fed three diets with different lipid sources, including beef tallow (BT), fish oil (FO), and an equal combination of soybean oil + BT + linseed oil (SBL) for 8 weeks at 3 practical salinity unit (psu). A total of 9622 isogenes were annotated in 316 KEGG pathways and 39, 42 and 32 pathways significantly changed in the paired comparisons of FO vs SBL, BT vs SBL, or FO vs BT, respectively. The pathways of glycerolipid metabolism, linoleic acid metabolism, arachidonic acid metabolism, glycerophospholipid metabolism, fatty acid biosynthesis, fatty acid elongation, fatty acid degradation, and biosynthesis of unsaturated fatty acid were significantly changed in all paired comparisons between dietary lipid sources, and the pathways of glycerolipid metabolism, linoleic acid metabolism, arachidonic acid metabolism and glycerophospholipid metabolism significantly changed in the FO vs SBL and BT vs SBL comparisons. These pathways are associated with energy metabolism and cell membrane structure. The results indicate that lipids sources affect the adaptation of *L. vannamei* to low salinity by providing extra energy or specific fatty acids to change gill membrane structure and control iron balance. The results of this study lay a foundation for further understanding lipid or fatty acid metabolism in *L. vannamei* at low salinity.

## Introduction

As a euryhaline penaeid species, the Pacific white shrimp *Litopenaeus vannamei* has become an emerging species for crustacean farming in inland low salinity water [1]. Although relatively high production of *L. vannamei* has been achieved, economic profit is hindered by slow growth and low survival [2], low immune ability [3], and low stress resistance [2, 4] at low salinity. Various studies have been conducted on *L. vannamei* growth and survival [5–7], immune response [8, 9] and nutritional requirements at low salinity [10–15], but little is known on the

**Competing Interests:** The authors have declared that no competing interests exist.

mechanism of physiological adaptation to the change of dietary nutrients from the perspective of metabolism pathways.

Among dietary nutrients, lipids are of the highest energy, and contain various essential fatty acids for growth and development in aquatic animals. The content of arachidonic acid (20:4n-6; AA) in gills is important for osmoregulation [16], and docosahexaenoic acid (22:6n-3; DHA) and eicosapentaenoic acid (20:5n-3; EPA) can increase the gill area and enzymatic efficiency to improve osmoregulation [17, 18]. Among lipid types, phospholipid and glycolipid are the indispensable components for cell membrane structure, and lipid composition affects osmoregulation capacity [19]. Therefore, lipids are functionally important in response to ambient salinity shock in aquatic animals, especially at low salinity [20]. Physiological functions of lipids are closely related to the relative components of fatty acids, triacylglycerol, phospholipid, cholesterol and phosphoglycerides in different tissues. The impact of lipid sources on *L. vannamei* growth performance has been evaluated at different salinities based on weight gain, feed conversion, survival and fatty acid composition [21, 22]. However, the optimal source of lipids for *L. vannamei* and the physiological response to different lipids at the salinity less than 5 psu are poorly known.

In contrast to freshwater species, marine species have a limited ability to synthesize long chain (>20 carbons) polyunsaturated fatty acids (LC-PUFAs) [23], and EPA and DHA are essential to marine animals [24]. Therefore, salinity may functionally important in regulating the synthesis of long chain PUFAs [25]. In a marine teleost, *Siganus canaliculatus* can convert C18 PUFA to LC-PUFA, and this activity is enhanced by decreasing salinity from 32 to 10 psu [25]. The desaturase and elongase enzymes required for synthesizing DHA from C18 PUFA in *S. canaliculatus* have been identified [26, 27], including  $\Delta 4$  fatty acyl desaturase ( $\Delta 4$  Fad) and a bifunctional  $\Delta 6/\Delta 5$  Fad [27]. In *L. vannamei*, both linolenic (C18:3n-3) in hepatopancreas and EPA (C20:5n-3) in muscle at 3 psu were significantly higher than those at 30 psu [20]. However, the potential ability of *L. vannamei* to synthesize LC-PUFA (>20 carbons) from C18 PUFA has not been revealed and the impact of ambient salinity on carbon chain elongation in shrimp is not clearly.

As a practical and efficient method to obtain the relatively complete genes and complex molecular pathways involved in physiological function [28–30], RNA sequencing (RNA-seq) has been applied in various aquatic animals [31–34], including *L. vannamei* [35], taura syndrome virus [36], and white spot syndrome virus [37]. In a previous study in our lab, the *L. vannamei* fed a diet with an equal combination of soybean oil +BT+ linseed oil (SBL) as the lipid source showed the highest weigh gain compared with other single lipid sources [38], but the molecular mechanism remains unknown. This study was a continuation of the previous study to understand the transcriptome response of hepatopancreas in *L. vannamei* to the source of dietary lipids. This is the first attempt to use transcriptome analysis to reveal the key pathways and genes sensitive to the change of dietary lipid sources in *L. vannamei* at low salinity. The results would lay a useful foundation to further understand the lipid or fatty acid metabolism in *L. vannamei* at low salinity.

## Materials and Methods

### Experimental animals, design and facilities

Juvenile white shrimp ( $1.86 \pm 0.32$  g) were obtained from the Shenzhen base of South China Sea Fisheries Research Institute, Shenzhen, China, and were stocked in nine tanks at a density of 40 shrimps per tank (500 L) at 17 psu salinity for one week. Then shrimp were acclimated to 3 psu by a daily change of 2 psu prior to the start of the 8-week experiment. During the acclimation period, shrimp were fed three times daily at 0800, 1600 and 2200 h with a commercial

diet (10% moisture, 40% crude protein, 8% crude lipid, 12% ash, 30% carbohydrates, 16.7 kJ g<sup>-1</sup> digestible energy), and when the experimental period started, shrimp were fed three times daily at 0800, 1600 and 2200 h with three purified diets containing different fatty acid contents (S1 and S2 Tables). Based on the amount of uneaten feed on the previous day, the daily ration was adjusted to a feeding level slight over satiation. The unfed feed was daily removed with a siphon tube. The photoperiod was 12 h light and 12 h dark. Seawater was pumped from the Daya Coast in Shenzhen and filtered through an activated carbon cartridge for at least 3 d before entering the culture system. Tap water was aerated before it was added to the tank to adjust the salinity level. During the experiment, water was exchanged once daily with 1/3 of the tank volume. Water quality parameters were monitored 2–3 times a week throughout the feeding trial, and maintained at pH 7.5–7.9, temperature 26–28°C, dissolved oxygen 4.8–6.4 mg/L, and total ammonia nitrogen <0.02 mg/L during the trial.

At the end of the experiment, shrimp were deprived of feed for 24 h before sampling. Five shrimp at intermolt stage C in each tank were dissected to obtain the hepatopancreas for transcriptome analysis. The hepatopancreas were carefully taken out from the shrimps by a sterilized tweezer and encased the hepatopancreas into a sterilized EP tube, then put the EP tube in the liquid nitrogen and stored at -80°C for RNA extraction.

### RNA extraction, library preparation and Illumina HiSeq2500 sequencing

Total RNA was extracted from the tissue of hepatopancreas by using the TRIzol® reagent according the manufacturer's instructions (Invitrogen) and genomic DNA was removed using DNase I (TaKara). Then RNA quality was determined by 2100 Bioanalyser (Agilent) and quantified using the NanoDrop 2000 (ND-2000, Gene Company limited). Only the high-quality RNA sample (OD260/280 = 1.8~2.2, OD260/230 ≥2.0, RIN ≥6.5, 28S:18S ≥1.0, >10 µg) was used to construct the sequencing library.

RNA-seq transcriptome library was prepared following the TruSeq™ RNA sample preparation instruction from Illumina (San Diego, CA) using 5 µg of total RNA. Shortly, messenger RNA was isolated according to the polyA selection method by oligo (dT) beads and then firstly segmented (100 to 400 bp) by a fragmentation buffer. Secondly double-stranded cDNA was synthesized using a SuperScript double-stranded cDNA synthesis kit (Invitrogen, CA) with random hexamer primers (Illumina). Then the synthesized cDNA was subject to end-repair, phosphorylation and 'A' base addition according to Illumina's library construction protocol. Libraries were size-selected for cDNA target fragments of 200–300 bp on 2% low range ultra-agarose followed by PCR amplification using Phusion DNA polymerase (NEB) for 15 PCR cycles. After being quantified by TBS380, the paired-end RNA-seq library was sequenced with the Illumina HiSeq 2500 (2 × 100 bp read length). Raw reads were archived at the National Center for Biotechnology Information's Sequence Read Archive under the accession No. SRP048814.

### De novo assembly and annotation

The raw paired end reads were trimmed and quality controlled by SeqPrep (<https://github.com/jstjohn/SeqPrep>) and Sickle (<https://github.com/najoshi/sickle>) with default parameters. Then clean data from the samples were used to do RNA de novo assembly with Trinity (<http://trinityrnaseq.sourceforge.net/>) [39]. All the assembled transcripts were searched against the NCBI protein nonredundant (NR), String and KEGG databases using BLASTX to identify the proteins that had the highest sequence similarity with the given transcripts to retrieve their function annotations. A typical cut-off E-value was set at <1.0×10<sup>-5</sup>. The BLAST2GO (<http://www.blast2go.com/b2ghome>) [40] program was used to obtain GO annotations of unique

assembled transcripts for describing biological processes, molecular functions and cellular components. Metabolic pathway analysis was performed using the Kyoto encyclopedia of genes and genomes (KEGG, <http://www.genome.jp/kegg/>) [41].

### Differential expression analysis and functional enrichment

To identify differential expression genes (DEGs) between two samples, the expression level of each transcript was calculated according to the fragments per kilobase of exon per million mapped reads (FRKM) method. RSEM (<http://deweylab.biostat.wisc.edu/rsem/>) [42] was used to quantify gene and isoform abundances. R statistical package software EdgeR (empirical analysis of digital gene expression in R, <http://www.bioconductor.org/packages/2.12/bioc/html/edgeR.html>) [43] was used for differential expression analysis. In addition, functional-enrichment analysis including GO and KEGG was performed to identify which DEGs were significantly enriched in GO terms and metabolic pathways at Bonferroni-corrected P-value  $\leq 0.05$  compared with the whole-transcriptome background. GO functional enrichment and KEGG pathway analysis were carried out by Goatools (<https://github.com/tanghaibao/Goatools>) and KOBAS (<http://kobas.cbi.pku.edu.cn/home.do>) [44].

### Experimental validation of RNA-seq profiles by qPCR

Fifteen randomly selected genes with significant expression from the KEGG pathways were used for validation by real-time qPCR. The gene-specific primers were designed by Primer Premier 6 (Table 1). Total RNA was extracted from the target hepatopancreas tissues using a TRI-pure Reagent kit (Aidlab, RN01). Samples of polyadenylated RNA were reverse-transcribed using a TaKaRa kit (Cat. No. RR036A). Reactions were carried out in a total volume of 20  $\mu$ l, and the volumes of the reaction components were as follows: 2  $\mu$ l 5X PrimeScript RT Master Mix (Perfect Real Time), 1  $\mu$ g total RNA, and followed by adding RNase-free dH<sub>2</sub>O up to 20  $\mu$ l. The protocol for reverse transcription was 37°C for 15 min, 85°C for 5 s, and 4°C for the rest of time. The qPCR was carried out in the CFX96™ Real-Time PCR system (Bio-Rad Laboratories, Richmond, CA) using Ultra SYBR Mixture (WCBIO, CW0957). The amplifications were performed in a 96-well plate in a 20  $\mu$ l reaction volume containing 10  $\mu$ l of UltraSYBR Mixture

**Table 1. Primers used for qPCR analysis.**

| Gene name  | Sense Primer            | Anti-sense Primer       | Product size |
|------------|-------------------------|-------------------------|--------------|
| CYP3A      | CTTGCTGTCCAGTGTGGTCCTA  | GTTGGTGGTTGCTGCCGTATAG  | 128          |
| ACAD8      | GCCAGGTTCCAGGATCAGATGCT | CACCACCTCCGCTTATGAATGC  | 104          |
| FLT1       | CCTCCTACAACCACCAGCAGAT  | GCCATCCTTGAACCACACGAAC  | 92           |
| BHMT       | TTCGTGTTCCGCCCTGGAGAA   | AGAAGGTGAACGCTTGCATGAC  | 145          |
| MLL2       | CGTGAAGATGTGGCTGGAGATG  | TAGACTAGGCTGGCGAGGACTT  | 138          |
| XDH        | CTCAGCATTGACGAGTCCGAAG  | TGACCCACGCAGGTAACCTTTCT | 149          |
| E1.14.11.1 | TGACATCCACCGACGCTATT    | GGCAGACTTCCTTGTGCTGTT   | 123          |
| SLC17A5    | TGGCGTGAGGTGTTCTCTGAT   | TTGTCATCGGCGTTGCTCTG    | 134          |
| AP1G1      | GGCATACTTGTGGACGGTCTG   | AGGTGTTGTGAGCGTGTGGA    | 97           |
| SMPD1      | AAGATTGAGACGCCAGAGTGT   | TGCCACAGATGTCACCGATGA   | 130          |
| CYP2J      | AGACCTACCTGGAGGAGAGCAT  | TGCGACCAACTGCCAGATGA    | 137          |
| CYP3A      | ACTCCTTCCACGAGCCATTGTT  | CGTCCTTCTTGTTCGGCATGTT  | 120          |
| DOT1L      | TGGCAAGCAGCACAGTGAGTA   | AGGCGAAGTTGTTGACGAAGAC  | 107          |
| MLL3       | ACGAAGAGGAGGACGAGGAGAA  | GGCTCAGGACCAGGCAATGTAT  | 148          |
| CTSC       | AGCAACCACCAGAAGCCAGTT   | GTTCTCCAGCACAAACCAACA   | 135          |

doi:10.1371/journal.pone.0144889.t001

**Table 2. Summary of Illumina expressed short read production and filtering of transcriptomic responses to low salinity stress in *Litopenaeus vannamei*.**

| Salinity | Reads      | nucleotides   | Q20 (%) | Q30 (%) |
|----------|------------|---------------|---------|---------|
| BT       | 47,256,862 | 4,772,943,062 | 96.57   | 91.34   |
| FO       | 45,745,774 | 4,620,323,174 | 96.81   | 91.79   |
| SBL      | 47,190,680 | 4,766,258,680 | 96.87   | 92.02   |
| Trimmed  |            |               |         |         |
| BT       | 45,620,924 | 4,501,250,936 | 99.09   | 94.57   |
| FO       | 44,250,222 | 4,372,768,553 | 99.13   | 94.80   |
| SBL      | 45,643,340 | 4,513,906,418 | 99.15   | 94.96   |

Note: Q20 means that every 100 bp sequencing reads will have an error and Q30 means that every 1000 bp sequencing reads will have an error.

doi:10.1371/journal.pone.0144889.t002

(WCBIO, CW0957), 0.4 µl (each) gene-specific forward and reverse primers, 8.4 µl RNase-free water and 0.8 µl cDNA. The thermal profile for UltraSYBR Mixture PCR was 95°C for 10 min followed by 40 cycles of 95°C for 15 s and 60°C for 1 min. The β-Actin gene was used as the reference gene and each gene had three replicated wells. Relative fold changes were calculated in the Relative Expression Software Tool version 2009 based on the cycle threshold values generated by qPCR [45].

## Results

### Sequencing and de novo assembly and validation of RNA-seq results by qPCR

A total of 140.18 million reads were obtained from the hepatopancreas of *L. vannamei* (Table 2). After quality trimming and adapter clipping, a total of 135.51 million high quality reads remained. In total, 26,034 genes and 38,237 isogenes with the average length of 1,610 bp were obtained after splicing and removing redundancy (Table 3). The length distribution of isogenes is shown in S1 Fig. The mapping data of the assembly isogenes were over 90% of the total, showing that the transcriptome data set had commendable gene coverage.

Fifteen randomly selected genes were determined with same hepatopancreas RNA samples by qPCR. All these genes were significantly associated with the RNA-seq results ( $R = 0.77$ , Fig 1). These results also further confirmed the reliability of RNA-seq and the accuracy in Trinity assembly.

### Annotation of isogenes

Among the annotated and predictable sequences, a total of 17,232 (76.83%), 6,298 (28.08%), 3,720 (16.58%) and 302 (1.35%) sequences were unambiguous alignments relative to the

**Table 3. Summary of de novo assembly results of transcriptomic responses to salinity stress in *Litopenaeus vannamei*.**

| Type              | Number      |
|-------------------|-------------|
| Total genes:      | 26034       |
| Total isogenes:   | 38237       |
| Total residues:   | 61573030 bp |
| Average length:   | 1610.3bp    |
| Largest isogene:  | 24554bp     |
| Smallest isogene: | 351bp       |

doi:10.1371/journal.pone.0144889.t003

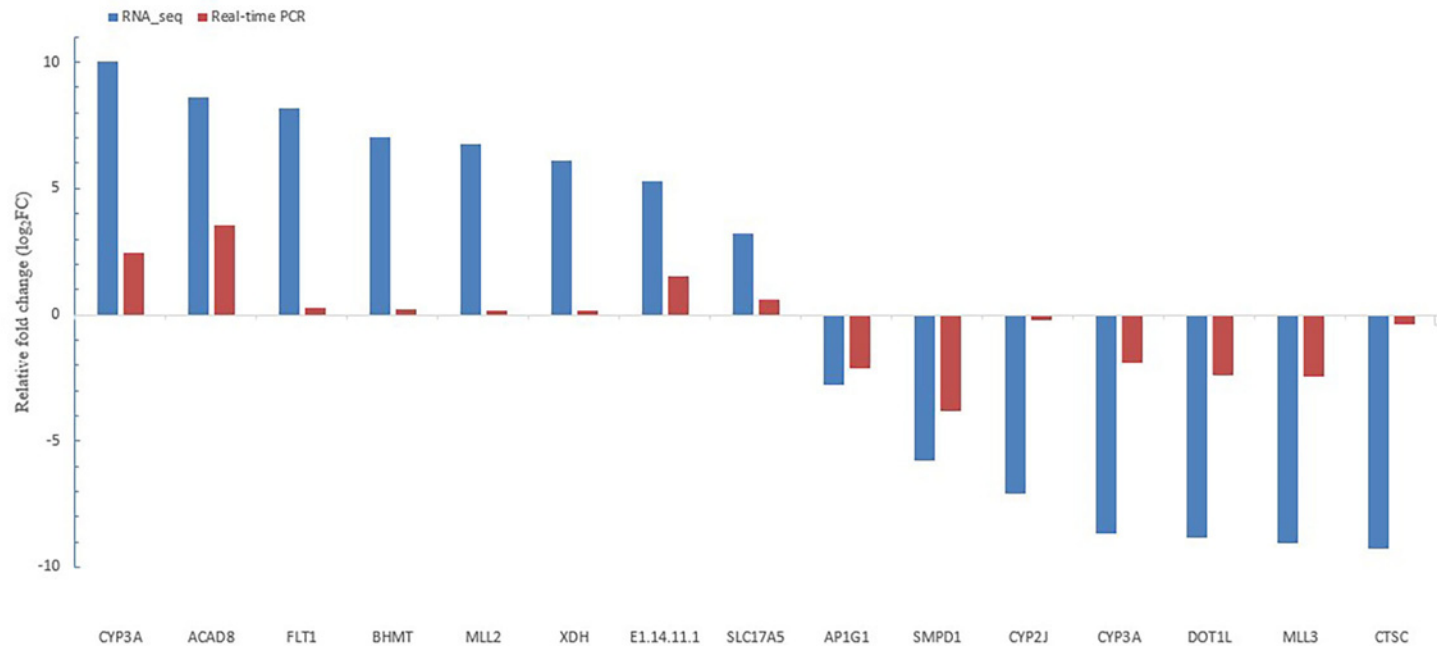

**Fig 1. Validation results of RNA-seq profiles by qPCR.**

doi:10.1371/journal.pone.0144889.g001

reference after BLASTx against NR and string, KOG, COG and NOG databases, respectively (Table 4). However, among unpredictable sequences, only 2,235 (14.14%), 746 (4.72%), 509 (3.22%), 313 (1.98%), 243 (1.54%), 128 (0.81%), 56 (0.35%) of the total 15,806 sequences were matched against NR, GO, NT, string, KOG, COG and NOG databases, respectively (Table 4).

Analysis of COG annotation showed that three types of function were obtained including information storage and processing, cellular processes and signaling, and metabolic pathways. The hits from COG prediction were functionally classified into 25 categories, in which most enriched terms were in general functions, followed by transcription and signal transduction mechanisms (S2 Fig).

### KEGG pathway annotation and functional enrichment analysis

There were 39, 42 and 32 pathways showing significant changes in paired-comparisons of FO vs SBL, BT vs SBL and FO vs BT, respectively and the significant changes of pathways

**Table 4. Summary of the annotations of *Litopenaeus vannamei* isogenes.**

|                     | Predicted sequences |           | Unpredictable sequences |           |
|---------------------|---------------------|-----------|-------------------------|-----------|
|                     | Number              | Ratio (%) | Number                  | Ratio (%) |
| All genes           | 22431               | 100       | 15806                   | 100       |
| Annotated in NR     | 17232               | 76.82     | 2235                    | 14.14     |
| Annotated in NT     | None                | None      | 509                     | 3.22      |
| Annotated in GO     | None                | None      | 746                     | 4.72      |
| Annotated in string | 6298                | 28.08     | 313                     | 1.98      |
| Annotated in COG    | 3720                | 16.58     | 128                     | 0.81      |
| Annotated in KOG    | 5408                | 24.11     | 243                     | 1.54      |
| Annotated in NOG    | 302                 | 1.35      | 56                      | 0.35      |

doi:10.1371/journal.pone.0144889.t004

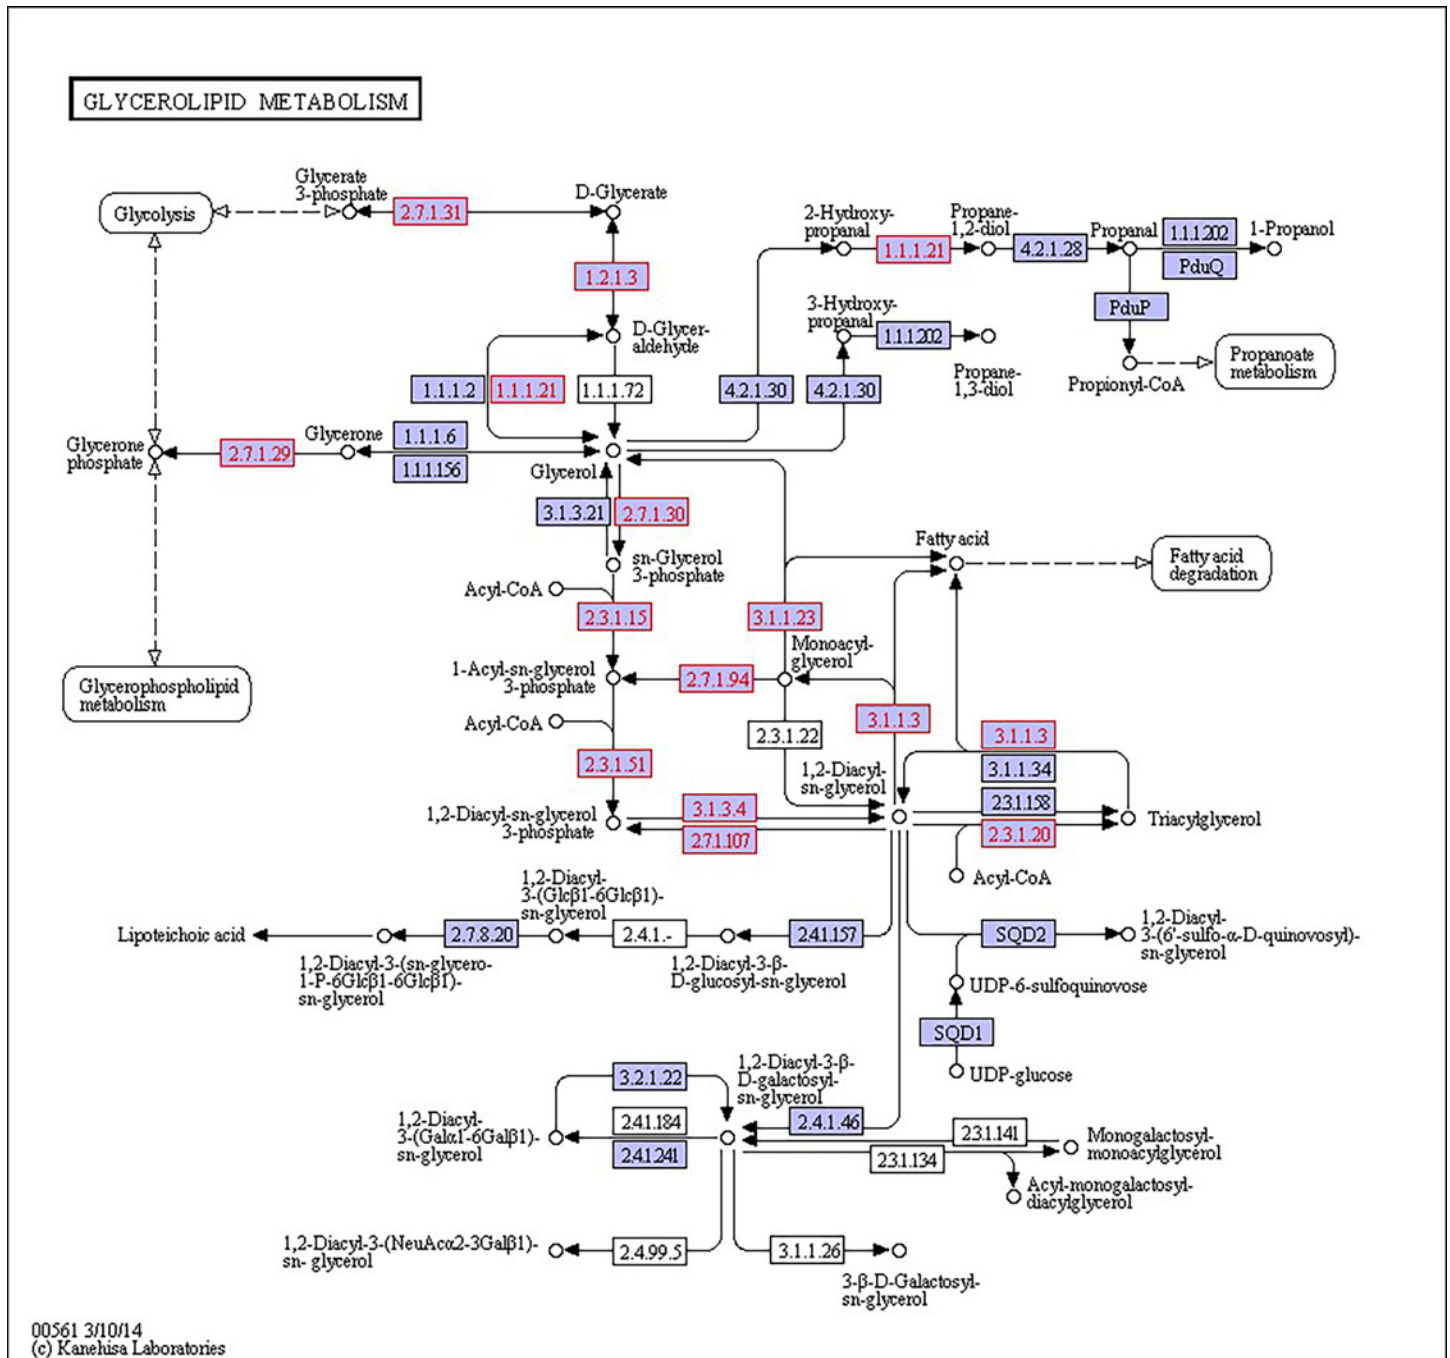

**Fig 2. Pathway of glycerolipid metabolism.**

doi:10.1371/journal.pone.0144889.g002

( $P < 0.05$ ) with the change of gene numbers were showed in S3, S4 and S5 Tables, respectively. The pathways of glycerolipid metabolism (Fig 2), fatty acid biosynthesis (Fig 3), fatty acid elongation (Fig 4), fatty acid degradation (Fig 5), biosynthesis of unsaturated fatty acid (Fig 6), glycerophospholipid metabolism (Fig 7), linoleic acid metabolism (Fig 8) and arachidonic acid metabolism (Fig 9) were changed in all three paired-comparisons, and the above pathways were significantly changed in FO vs SBL and BT vs SBL, but in comparison of BT vs FO, only

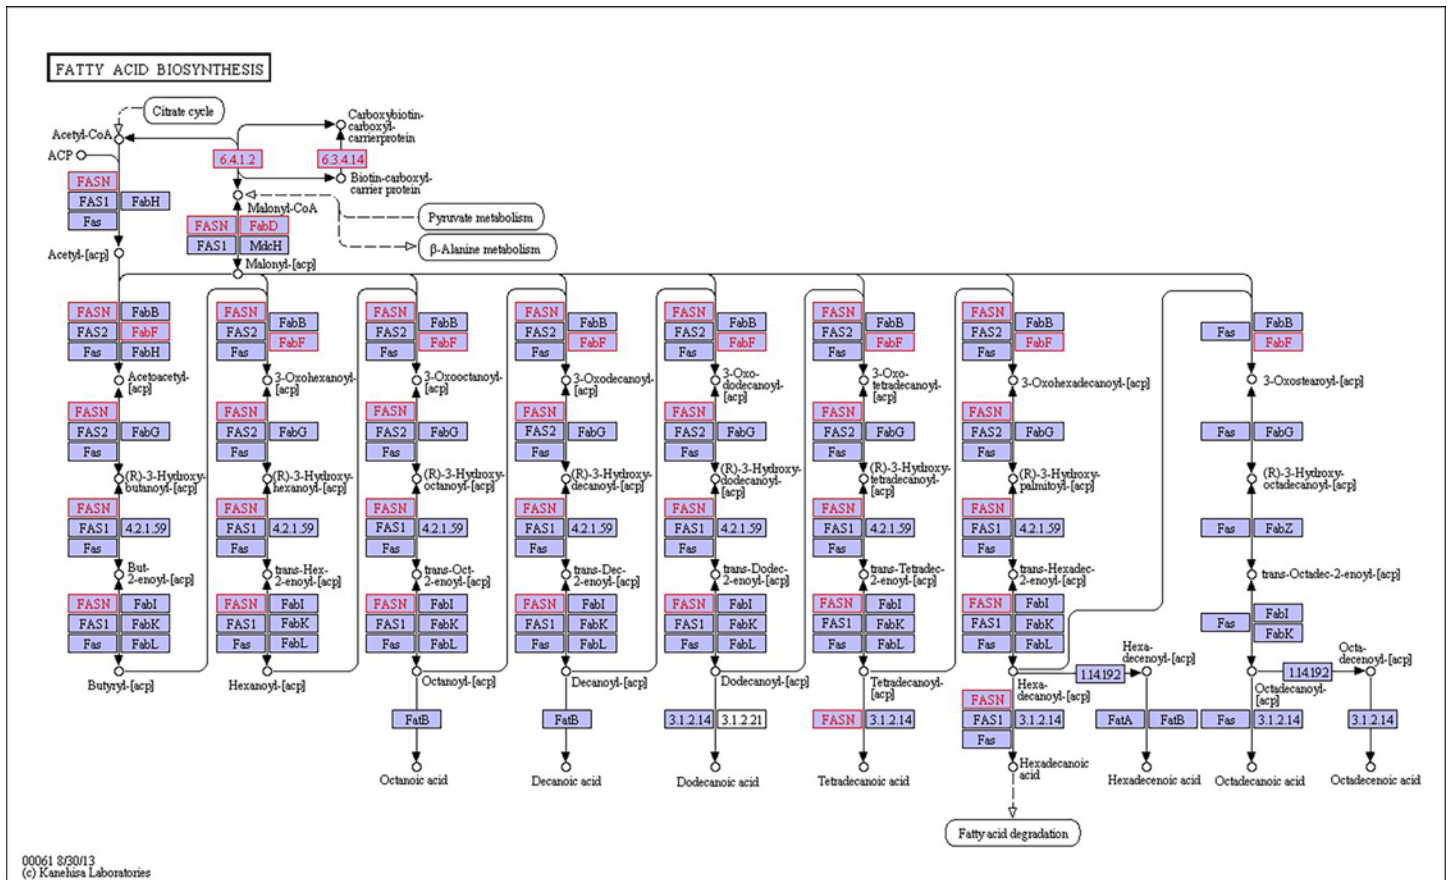

**Fig 3. Pathway of fatty acid biosynthesis.**

doi:10.1371/journal.pone.0144889.g003

linoleic acid metabolism was changed significantly. The genes of triacylglycerol lipase, aldehyde reductase, phosphatidate phosphatase, diacylglycerol kinase (ATP) and glycerol kinase were significantly up or down-regulated in the glycerolipid metabolism pathway. In the glycerophospholipid metabolism pathway, many genes were significantly regulated especially in secretory phospholipase A2, phosphoethanolamine N-methyltransferase, lysophospholipase I, glycerol-3-phosphate dehydrogenase (NAD+), lysophosphatidylcholine acyltransferase and ethanolamine kinase. The utilization of polyunsaturated fatty acids was enhanced at low salinity, especially in arachidonate and linoleate. All the significantly changed ( $P < 0.05$ ) KEGG genes were listed in Table 5.

### Discussion

In this study, RNA-seq successfully revealed the dietary lipid sources significantly changed the pathways of glycerolipid metabolism, linoleic acid metabolism, arachidonic acid metabolism, glycerophospholipid metabolism, fatty acid biosynthesis, fatty acid elongation, fatty acid degradation and biosynthesis of unsaturated fatty acid. These pathways can be generally categorized into energy metabolism related pathways, cell membrane structure modulation related pathways and other pathways. Since the growth trial was conducted on *L. vannamei* at 3 psu, a low salinity causing stress to this marine shrimp, the significant changes of pathways in this study reflect the physiological response of *L. vannamei* to different dietary lipid sources in a stressful condition.



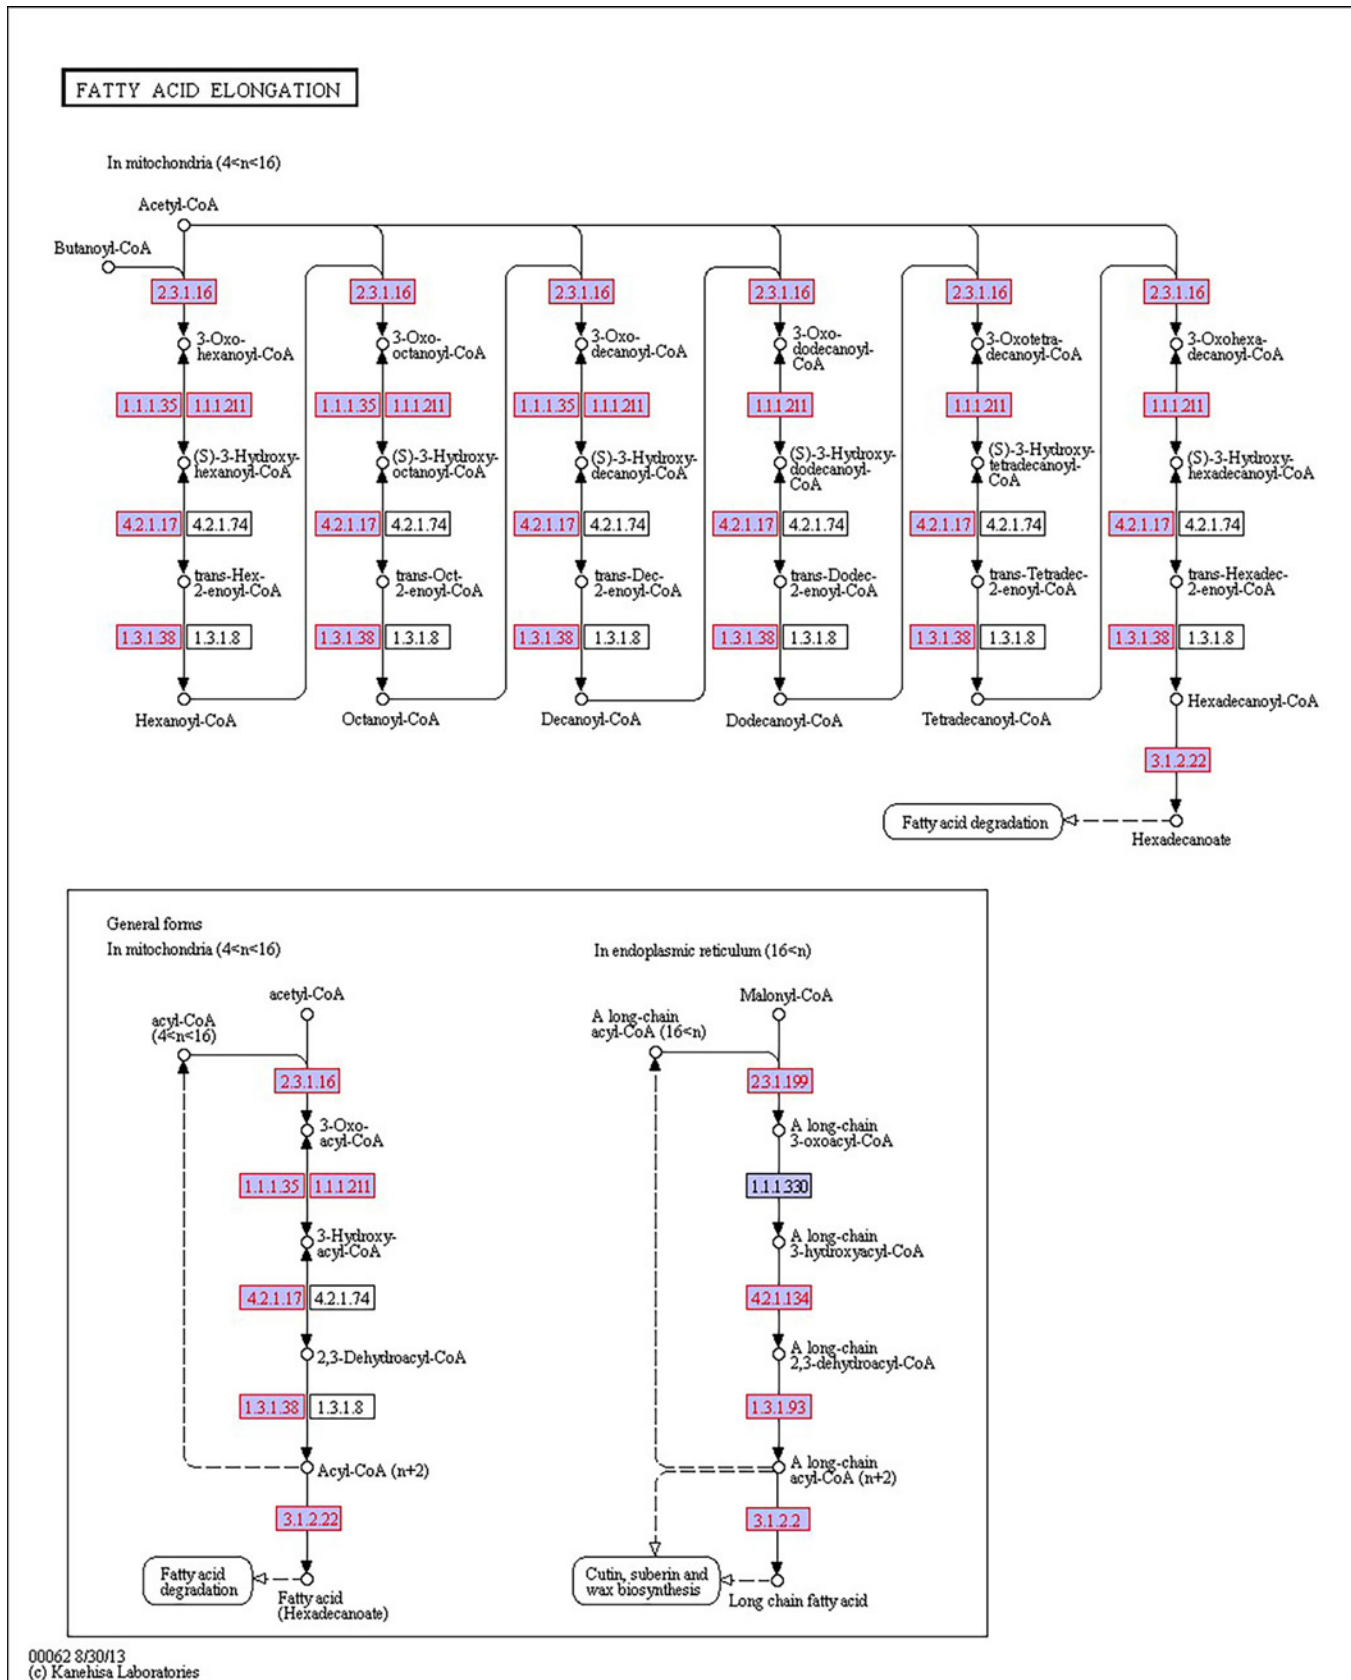

Fig 4. Pathway of fatty acid elongation.

doi:10.1371/journal.pone.0144889.g004

### Pathways of lipid metabolism involved into energy supply

Extra energy supply is required in osmoregulation for crustaceans to survive in a habitat with high salinity fluctuation, especially in a low salinity environment [19, 46]. When *L. vannamei* are under low salinity stress, the change of osmolality in hemolymph can lead to

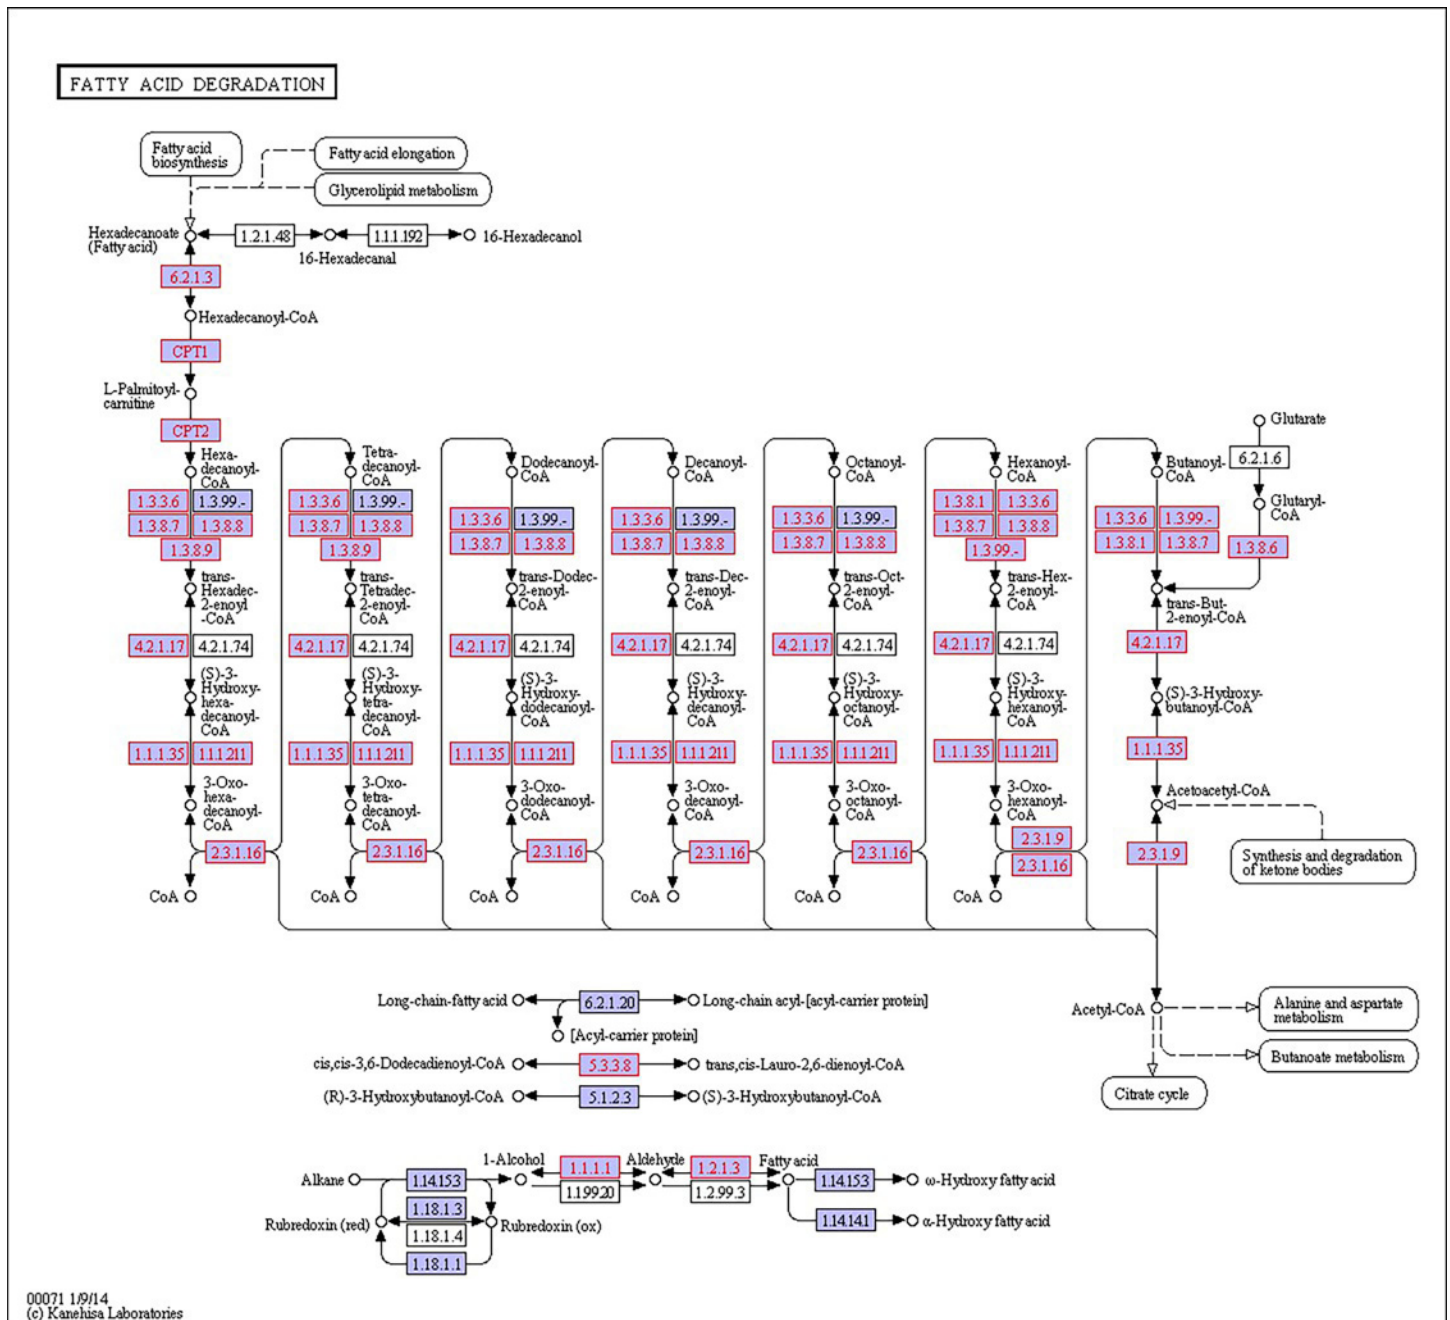

Fig 5. Pathway of fatty acid degradation.

doi:10.1371/journal.pone.0144889.g005

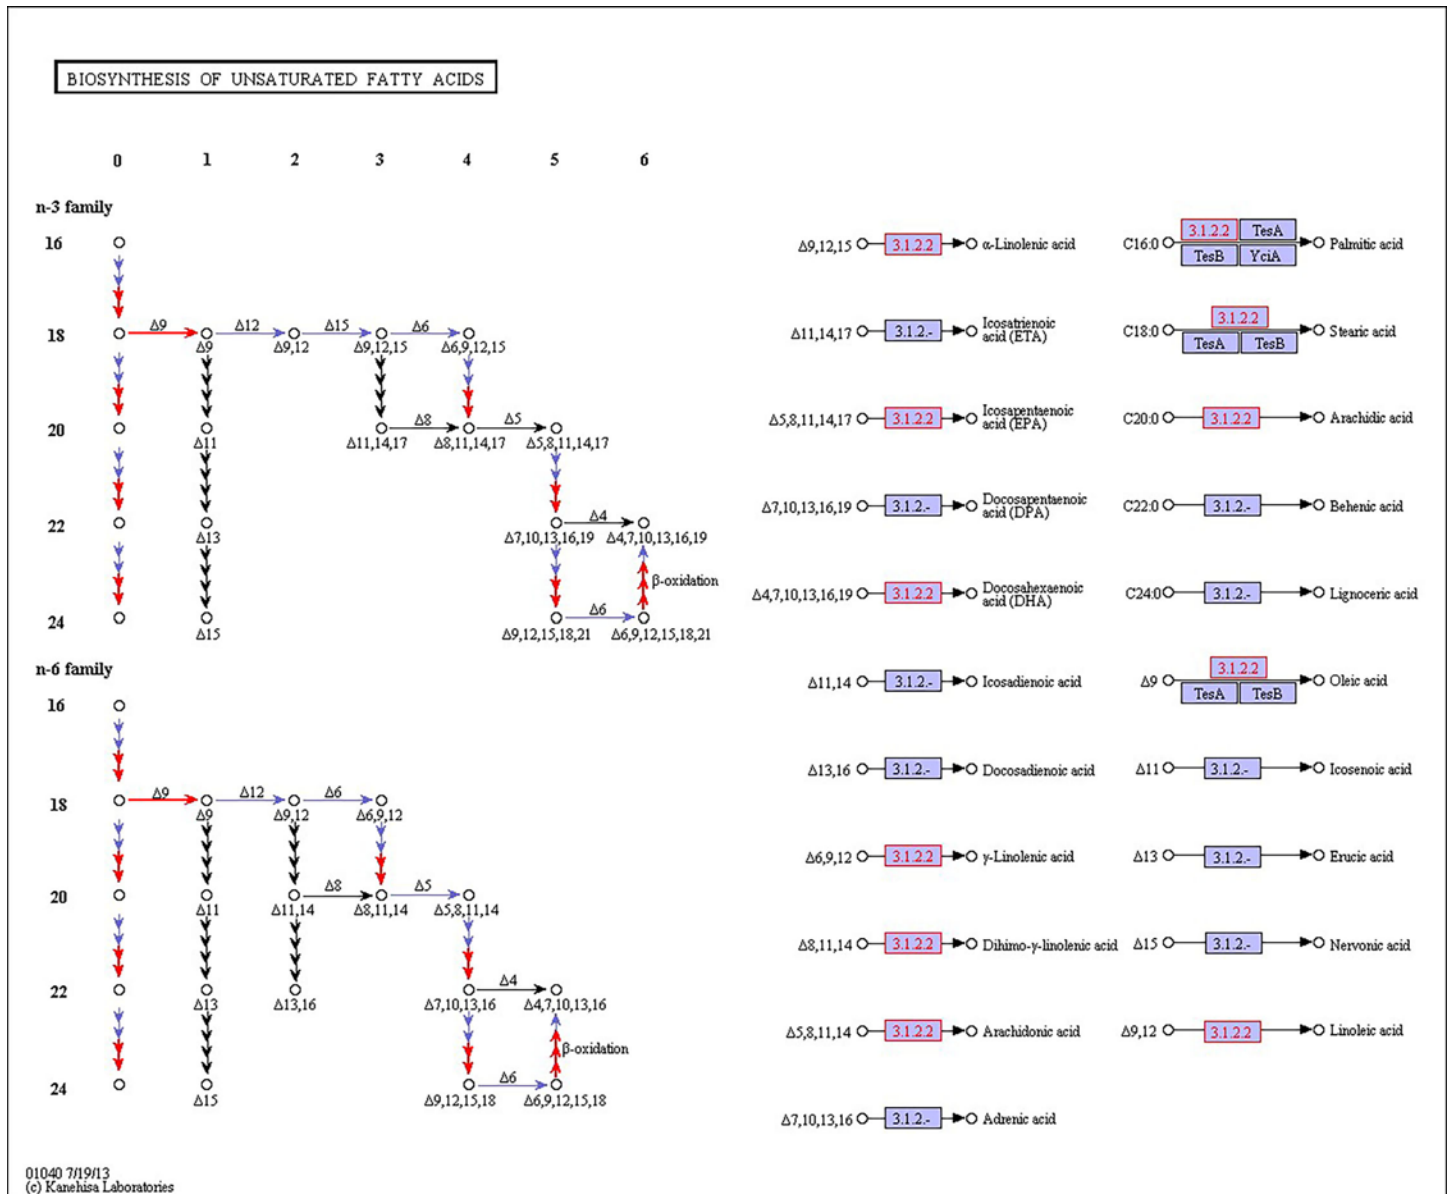

**Fig 6. Pathway of biosynthesis of unsaturated fatty acid.**

doi:10.1371/journal.pone.0144889.g006

osmoregulation to counteract salinity shock [47, 48]. To keep homeostasis under low salinity, shrimp could obtain extra energy from the diet to maintain osmolality in hemolymph via active ion transport [12, 19, 46], and diet lipid contents have proved of significant roles in this process [20, 35, 49, 50]. In this study, some pathways including glycerolipid metabolism (Fig 2), fatty acid biosynthesis (Fig 3), fatty acid elongation (Fig 4), fatty acid degradation (Fig 5) and PPAR signaling pathways (Fig 10), were mainly involved in energetic adaptation to low salinity stress. It has been proved that crustaceans prefer to use shorter-chain fatty acids to obtain energy through  $\beta$ -oxidation [51] and saturated fatty acid would be primarily used in energy metabolism. In this study, the BT diet contained highest saturated fatty acids with a proportion of 53.86%, and the FO diet (32.66%) had little higher fatty acids than the SBL diet (28.23%). The results of glycerolipid metabolism showed that the gene expression of triacylglycerol lipase was

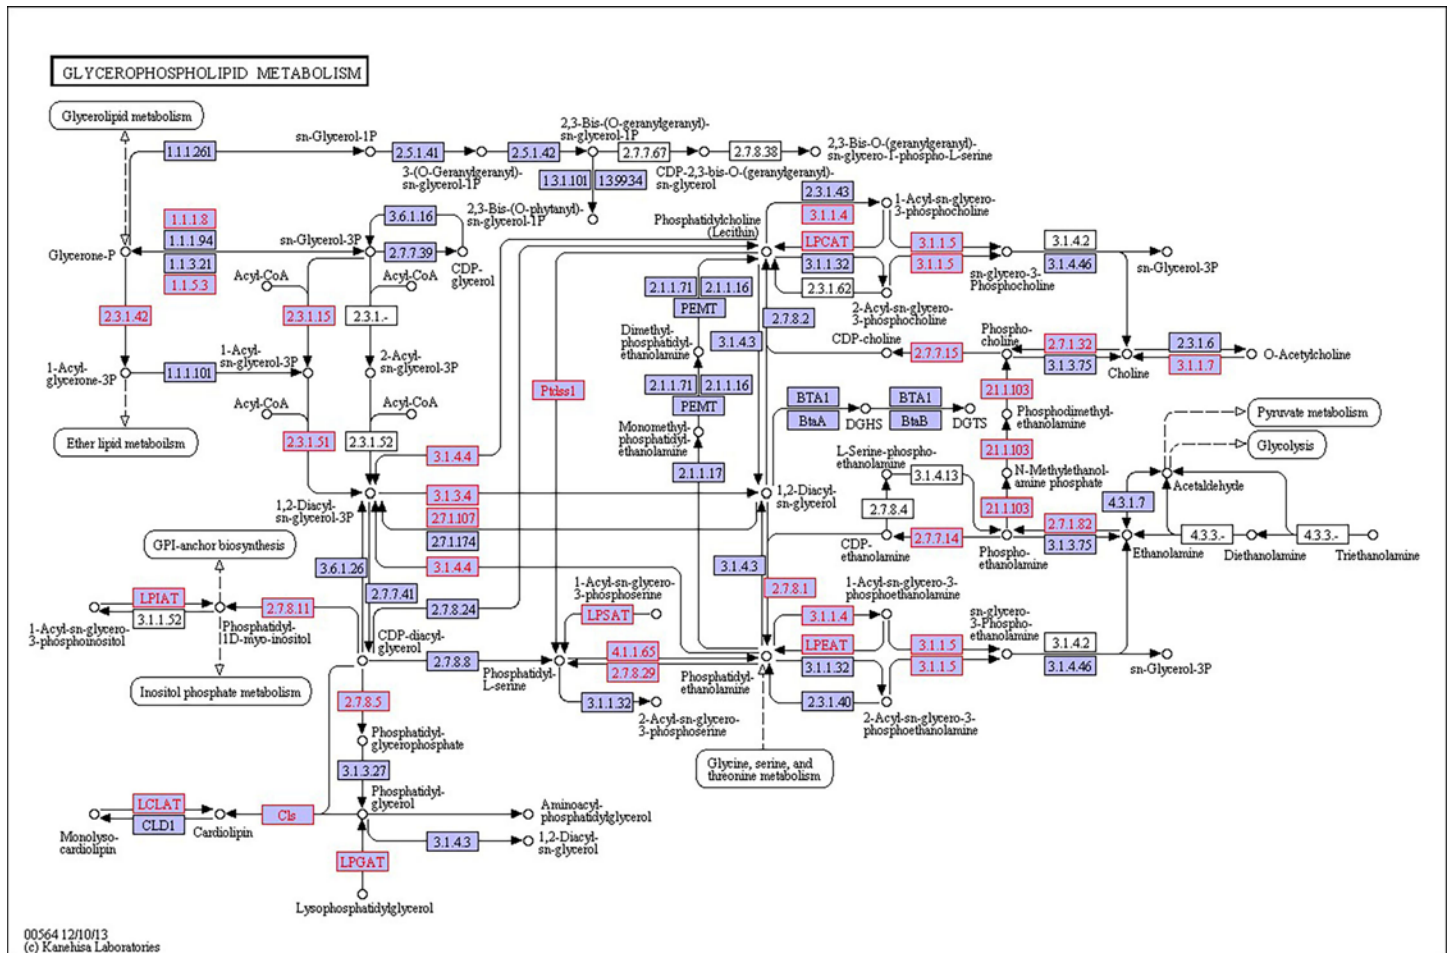

**Fig 7. Pathway of glycerophospholipid metabolism.**

doi:10.1371/journal.pone.0144889.g007

significantly enhanced in all paired comparison of FO vs BT, FO vs SBL and BT vs SBL, and led to fatty acid hydrolyzation from triacylglycerol to fatty acid degradation (Fig 5). Interestingly, the fatty acid synthase gene responsible for synthesis of 18C fatty acid was down-regulated by diet FO compared with diet BT. We speculate that this phenomenon was due to the inhibition effect on the mRNA of fatty acid synthase (FAS) by intake of excess dietary polyunsaturated fatty acids such as DHA and EPA [52, 53], resulting in poorer growth performance of shrimp fed FO than those fed SBL (S6 Table). Meanwhile, glycerol kinase, glycerol-3-phosphate O-acyltransferase, 1-acyl-sn-glycerol-3-phosphate acyltransferase and phosphatidate phosphatase were up-regulated both in the comparisons of FO vs SBL and BT vs SBL, suggesting that the synthesis of triacylglycerol from glycerol was enhanced. In the contrary, the synthesis of triacylglycerol in shrimp fed FO was down-regulated compared to those fed BT. In conclusion, shrimp fed BT had highest capability to synthesize triacylglycerol, followed by those fed FO, and shrimp fed SBL were poorest.

In fatty acid degradation,  $\beta$ -oxidation is the principal pathway to oxidize fatty acid to gain ATP in peroxisomes [54], and all the long-chain acyl-CoA synthetases were down-regulated due to the utilization of fatty acids in  $\beta$ -oxidation. Meanwhile, the acyl-CoA oxidase and long-chain-acyl-CoA dehydrogenase were significantly up-regulated in both FO and BT diet groups compared with the SBL diet group, and the up-regulation in the BT diet group was more than

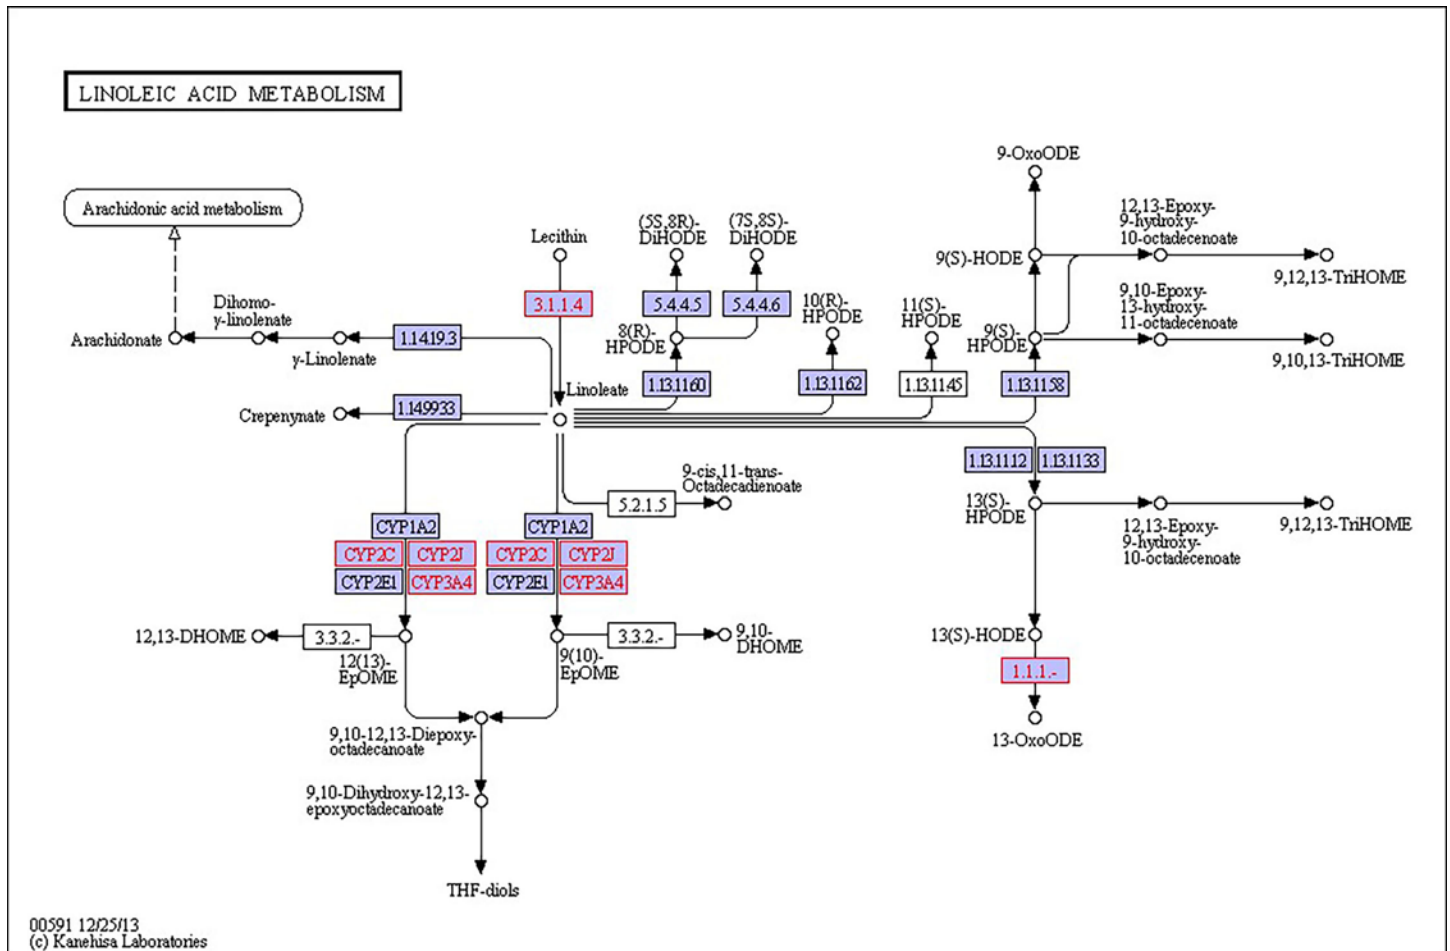

**Fig 8. Pathway of linoleic acid metabolism.**

doi:10.1371/journal.pone.0144889.g008

in the FO diet group. Shrimp fed BT had the highest gene expression in saturated fatty acid degradation due to possessing the highest proportion of saturated fatty acid. Fatty acid plays an important role in energy supplementation in osmoregulation [19, 20]. In the fatty acid elongation pathway, the gene expression of palmitoyl-protein thioesterase in shrimp fed FO was up-regulated the most, followed those fed BT and SBL. The palmitoyl-protein thioesterase can remove palmitate groups from cysteine residues in lipid-modified proteins [55] and produce palmitic acid for fatty acid degradation. On the other hand, the peroxisome proliferator-activated receptors (PPARs) are a group of nuclear receptor proteins that function as transcription factors regulating the expression of genes to regulate carbohydrate, lipid, and protein metabolism and especially in fatty acid catabolism [56, 57]. The of gene acyl-CoA oxidase (ACO) higher expressed in shrimp fed FO or BT than those fed SBL, and the expression in the FO group was significantly lower than in BT group (Fig 10). As shrimp in the BT diet group contained the highest saturated fatty acid proportion, saturated fatty acid can be used in producing acyl-CoA to supply energy through oxidation [54]. The high content of saturated fatty acid would promote the production of fatty acid transporters for fatty acid transportation.

Shrimp fed BT possessed the highest saturated fatty acid which could be used as energy supplementation for osmoregulation, but shrimp fed BT showed the poorest growth performance in all three groups. It seems that sole energy intake is not sufficient to overcome the energy loss



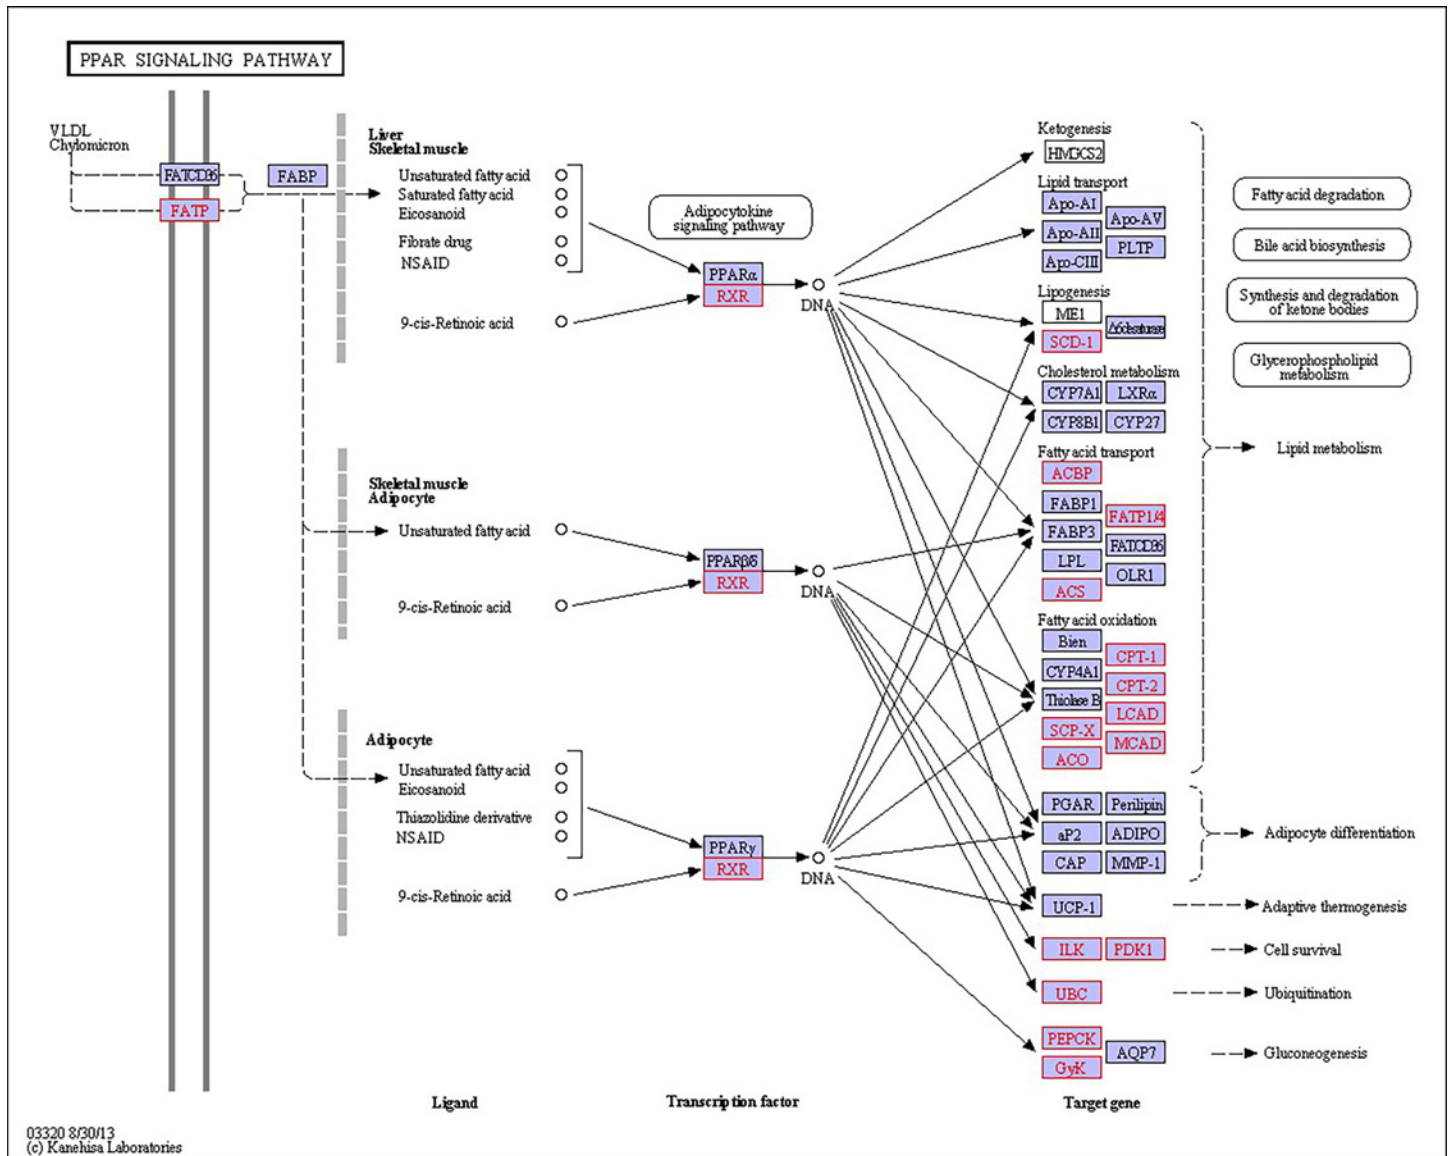

**Fig 10. Pathway of PPAR signaling pathway.**

doi:10.1371/journal.pone.0144889.g010

stress [46, 58, 59]. Previous studies have shown that dietary PUFAs can improve growth and osmoregulation capacity in aquatic animals under osmotic shock [17, 18, 20] because PUFAs are closely associated with cell membrane to increase membrane permeability and enhance fluidity [60, 61]. The modification of fatty acid composition in gills with higher levels of LC-PUFA (usually over 20 carbon atom, especially DHA and EPA) have the potential to increase the gill area and enzymatic efficiency [17, 18] to improve osmoregulatory capacity [62]. Therefore, LC-PUFAs can play a crucial role in osmoregulation, and supplementation of LC-PUFA in the diet should satisfy the need of *L. vannamei*. However, we found that shrimp fed FO containing highest LC-PUFAs did not show the best growth performance, but shrimp fed SBL displayed the best growth. Considering the energy supplementation in diets, the BT diet possessed the highest saturated fatty acids (SFAs) but lacked PUFAs. In contrast, the FO diet contained highest PUFAs but lowest SFAs. Shrimp fed either BT or FO diet did not show a satisfactory

growth. Although the SBL diet had high SFA and  $\alpha$ -linolenic acid (C18:3n-3) to satisfy energy requirement, but this diet was short of LC-PUFA just like the BT diet. Thus, we speculate that the reason why shrimp fed SBL exhibited best growth performance may due to the ability to synthesize LC-PUFAs from  $\alpha$ -linolenic acids in *L. vannamei*.

Most marine shrimp have a limited ability to synthesize LC-PUFAs [23], but our previously study indicates that *L. vannamei* may possess the ability to synthesize DHA and EPA from  $\alpha$ -linolenic acids at low salinity [20]. We also found that relevant gene expressions (gene bank accession number: KP271446 and KT305965) in the pathways of fatty acid elongation and unsaturated fatty acids biosynthesis, which supports the above assumption. In the biosynthesis pathway for unsaturated fatty acid pathway, acyl-CoA thioesterase is the crucial gene for synthesizing long-chain unsaturated fatty acid especially DHA and EPA. It is clear that the gene expression in the FO diet group was most down-regulated, followed by the BT diet group, and the SBL diet group was lowest. It is deduced that the shrimp in the SBL diet group need extra long-chain PUFAs and the SBL diet had the highest  $\alpha$ -linolenic acids and led to highest gene expression of acyl-CoA thioesterase. However, the FO diet group showed poorest gene expression of acyl-CoA thioesterase because of sufficient long-chain PUFAs in this diet. Therefore, this evidence suggests that *L. vannamei* possess the ability to synthesize DHA and EPA from  $\alpha$ -linolenic acids under low salinity stress.

On the other hand, glycerophospholipid is the main component of biological membrane [63], and the glycerophospholipid metabolism pathway significantly changed in this study. The gene expression of glycerol-3-phosphate dehydrogenase was up-regulated most in FO diet group, followed by the BT diet group and the SBL diet group. Glycerone phosphate would increase when the glycerol-3-phosphate dehydrogenase up-regulated, and the glycerone phosphate can be used in glycerolipid metabolism for lipid metabolism to resist osmotic shock [54, 64]. Furthermore, the lecithin was used in linoleic acid metabolism because the gene secretory phospholipase A2 significantly up-regulated, resulting in high production of linoleate/linoleic acid. The linoleate/linoleic acid can be used in arachidonic acid metabolism, and arachidonic acid not only had a positive effect on aquatic animals but also can alleviate osmotic shock [65]. But, the specific mechanism of glycerophospholipid and arachidonic pathway still need further study.

### Other pathways in *L. vannamei* under low salinity stress

When shrimp are at low salinity stress, dietary lipids play an important role in osmoregulation [20, 35]. Among three lipid sources in this study, the pathways of osmoregulation differed between the types and contents of fatty acids in the diet. As osmoregulation is a complex process, many pathways are directly or indirectly involved. However, no clear evidence on direct involvement of the pathways were detected during the trial of salinity challenge. Thus, the putative functions of some pathways are briefly discussed.

Amino acids are important osmotic effectors in crustacean [31, 66, 67]. In this study, the pathways of many amino acids were involved such as lysine, valine, leucine and isoleucine. Lysine is metabolized in eukaryotes to yield acetyl-CoA via lysine acetylation [68, 69]. Acetyl-CoA participates in osmoregulation as an intermediate metabolite can indirectly influence ion transfer or energy metabolism and promote "compensatory processes", by producing energy from lipid and carbohydrate metabolism. On the other hand, ketone bodies also play an indispensable role in energy metabolism during the period of low food intake or carbohydrate restriction and energy has to be obtained from breaking down fatty acids in liver [70, 71].

Moreover, steroid hormones are involved in osmoregulation of cetaceans [72] to control metabolism, immune functions and salt and water balance [73–75]. Phosphonates are effective



chelating agents that remain stable under harsh conditions, and phosphonates are also regularly used in reverse-osmosis systems [76]. On the other hand, the study of folate on osmoregulation is sometimes seen in plants because plants often face salinity stress in saline soils, and folate is involved in osmoregulation as a metabolite or metabolic intermediate [77, 78]. In this study drug metabolism-cytochrome P450 pathways were found and cytochrome P450 may indirectly influence osmoregulation by regulating arachidonic acid metabolism [79, 80], fatty acid metabolism [81] or other physiological and biochemical processes. However, the interaction or correlation between these pathways in osmoregulation is still not clear and requires further study.

## Conclusion

This study reported the response of *L. vannamei* at low salinity to different sources of dietary lipid at the transcriptome level. The transcriptome analysis shows that when *L. vannamei* are under osmotic shock, the osmoregulation in shrimp depends on the source and content of fatty acid in the diet. The metabolism of SFA supplies sufficient energy for extra energy demand via  $\beta$ -oxidation of fatty acids. On the other hand, long-chain unsaturated fatty acid will participate in structural change of cell membrane to regulate the permeability and fluidity, and increase the cell membrane area on gills. A series of lipid metabolism pathways have enhanced the capability of *L. vannamei* to cope with osmotic shock and have a positive effect on growth and survival. However, osmoregulation is a complex physiological process and involves many pathways. The details of specific lipid metabolism for osmoregulation are still unclear and need further study. Based on the findings in this transcriptomic study, future research should be conducted to understand protein expression, and biochemical and physiological functions in shrimp at low salinity.

## Supporting Information

**S1 Fig. Length distribution of isogenes by Illumina sequencing.**

(TIF)

**S2 Fig. Distribution of isogenes annotated with COG terms.**

(TIF)

**S1 Table. Formulation and proximate of experimental diets.**

(DOCX)

**S2 Table. Fatty acids composition of experimental diets (% by weight of total fatty acids).**

(DOCX)

**S3 Table. The significantly changed KEGG pathway of *L. vannamei* in FO vs SBL.**

(DOCX)

**S4 Table. The significantly changed KEGG pathway of *L. vannamei* in BT vs SBL.**

(DOCX)

**S5 Table. The significantly changed KEGG pathway of *L. vannamei* in FO vs BT.**

(DOCX)

**S6 Table. Growth, survival (%) and body composition (g/kg wet weight) of white shrimp at 3‰ salinities.**

(DOCX)

## Acknowledgments

This research was supported by grants from the National Natural Science Foundation of China (No. 31472291, 31172422), the Special Fund for Agro-scientific Research in the Public Interest (No. 201203065), and partly by the E-Institute of Shanghai Municipal Education Commission (No. E03009) and ECNU innovation fund.

## Author Contributions

Conceived and designed the experiments: KC EL. Performed the experiments: KC. Analyzed the data: KC. Contributed reagents/materials/analysis tools: KC ZX TL CX. Wrote the paper: KC EL JQ LC. Submitted and revised the manuscript: KC.

## References

1. Cheng KM, Hu CQ, Liu YN, Zheng SX, Qi XJ. Effects of dietary calcium, phosphorus and calcium/phosphorus ratio on the growth and tissue mineralization of *Litopenaeus vannamei* reared in low-salinity water. *Aquaculture*. 2006; 251(2–4):472–83. PMID: [WOS:000235263300032](#).
2. Li EC, Chen LQ, Zeng C, Chen XM, Yu N, Lai QM, et al. Growth, body composition, respiration and ambient ammonia nitrogen tolerance of the juvenile white shrimp, *Litopenaeus vannamei*, at different salinities. *Aquaculture*. 2007; 265(1–4):385–90. PMID: [WOS:000246128800041](#).
3. Ponce-Palafox J, Martinez-Palacios CA, Ross LG. The effects of salinity and temperature on the growth and survival rates of juvenile white shrimp, *Penaeus vannamei*, Boone, 1931. *Aquaculture*. 1997; 157(1–2):107–15. PMID: [WOS:000071073000009](#).
4. Li EC, Chen LQ, Zeng C, Yu N, Xiong ZQ, Chen XF, et al. Comparison of digestive and antioxidant enzymes activities, haemolymph oxyhemocyanin contents and hepatopancreas histology of white shrimp, *Litopenaeus vannamei*, at various salinities. *Aquaculture*. 2008; 274(1):80–6. PMID: [WOS:000252920700011](#).
5. Laramore S, Laramore CR, Scarpa J. Effect of low salinity on growth and survival of postlarvae and juvenile *Litopenaeus vannamei*. *Journal of the World Aquaculture Society*. 2001; 32(4):385–92.
6. Davis DA, Boyd CE, Rouse DB, Saoud IP. Effects of Potassium, Magnesium and Age on Growth and Survival of *Litopenaeus vannamei* Post-Larvae Reared in Inland Low Salinity Well Waters in West Alabama. *Journal of the World Aquaculture Society*. 2005; 36(3):416–9.
7. Roy LA, Davis DA, Saoud IP, Henry RP. Effects of varying levels of aqueous potassium and magnesium on survival, growth, and respiration of the Pacific white shrimp, *Litopenaeus vannamei*, reared in low salinity waters. *Aquaculture*. 2007; 262(2):461–9.
8. Wang L-U, Chen J-C. The immune response of white shrimp *Litopenaeus vannamei* and its susceptibility to *Vibrio alginolyticus* at different salinity levels. *Fish & Shellfish Immunology*. 2005; 18(4):269–78.
9. Li C-C, Yeh S-T, Chen J-C. Innate immunity of the white shrimp *Litopenaeus vannamei* weakened by the combination of a *Vibrio alginolyticus* injection and low-salinity stress. *Fish & shellfish immunology*. 2010; 28(1):121–7.
10. Wang X, Li E, Xu C, Qin JG, Wang S, Chen X, et al. Growth, body composition, ammonia tolerance and hepatopancreas histology of white shrimp *Litopenaeus vannamei* fed diets containing different carbohydrate sources at low salinity. *Aquac Res*. 2014.
11. Wang X, Li E, Qin JG, Wang S, Chen X, Cai Y, et al. Growth, Body Composition, and Ammonia Tolerance of Juvenile White Shrimp *Litopenaeus vannamei* Fed Diets Containing Different Carbohydrate Levels at Low Salinity. *Journal of Shellfish Research*. 2014; 33(2):511–7.
12. Davis DA, Saoud IP, McGraw WJ, Rouse DB. Considerations for *Litopenaeus vannamei* reared in inland low salinity waters. *Avances en Nutrición Acuícola VI Memorias del VI Simposium Internacional de Nutrición Acuícola Cancún, México*. 2002; 3:pp. 73–90.
13. Li E, Yu N, Chen L, Zeng C, Liu L, Qin JG. Dietary Vitamin B6 Requirement of the Pacific White Shrimp, *Litopenaeus vannamei*, at Low Salinity. *Journal of the World Aquaculture Society*. 2010; 41(5):756–63.
14. Liu Y, Wang W-N, Wang A-L, Wang J-M, Sun R-Y. Effects of dietary vitamin E supplementation on antioxidant enzyme activities in *Litopenaeus vannamei* (Boone, 1931) exposed to acute salinity changes. *Aquaculture*. 2007; 265(1–4):351–8. doi: [10.1016/j.aquaculture.2007.02.010](#)
15. Chien Y-H, Pan C-H, Hunter B. The resistance to physical stresses by *Penaeus monodon* juveniles fed diets supplemented with astaxanthin. *Aquaculture*. 2003; 216(1):177–91.

16. Tocher DR, Bell JG, Dick JR, Henderson RJ, McGhee F, Michell D, et al. Polyunsaturated fatty acid metabolism in Atlantic salmon (*Salmo salar*) undergoing parr-smolt transformation and the effects of dietary linseed and rapeseed oils. *Fish Physiol Biochem*. 2000; 23(1):59–73. doi: [10.1023/A:1007807201093](https://doi.org/10.1023/A:1007807201093)
17. Palacios E, Bonilla A, Perez A, Racotta IS, Civera R. Influence of highly unsaturated fatty acids on the responses of white shrimp (*Litopenaeus vannamei*) postlarvae to low salinity. *Journal of Experimental Marine Biology and Ecology*. 2004; 299(2):201–15. PMID: [WOS:000188948700004](https://pubmed.ncbi.nlm.nih.gov/188948700004/).
18. Hurtado MA, Racotta IS, Civera R, Ibarra L, Hernandez-Rodriguez M, Palacios E. Effect of hypo- and hypersaline conditions on osmolality and Na<sup>+</sup>/K<sup>+</sup>-ATPase activity in juvenile shrimp (*Litopenaeus vannamei*) fed low- and high-HUFA diets. *Comparative biochemistry and physiology Part A, Molecular & integrative physiology*. 2007; 147(3):703–10. doi: [10.1016/j.cbpa.2006.07.002](https://doi.org/10.1016/j.cbpa.2006.07.002) PMID: [16935535](https://pubmed.ncbi.nlm.nih.gov/16935535/).
19. Tseng YC, Hwang PP. Some insights into energy metabolism for osmoregulation in fish. *Comp Biochem Phys C*. 2008; 148(4):419–29. PMID: [WOS:000261600100015](https://pubmed.ncbi.nlm.nih.gov/000261600100015/).
20. Chen K, Li E, Gan L, Wang X, Xu C, Lin H, et al. Growth and Lipid Metabolism of the Pacific White Shrimp *Litopenaeus vannamei* at Different Salinities. *Journal of Shellfish Research*. 2014; 33(3):825–32. doi: [10.2983/035.033.0317](https://doi.org/10.2983/035.033.0317)
21. Lim C, Ako H, Brown CL, Hahn K. Growth response and fatty acid composition of juvenile *Penaeus vannamei* fed different sources of dietary lipid. *Aquaculture*. 1997; 151(1–4):143–53. PMID: [WOS:A1997XH72600014](https://pubmed.ncbi.nlm.nih.gov/1997XH72600014/).
22. Zhou QC, Li CC, Liu CW, Chi SY, Yang QH. Effects of dietary lipid sources on growth and fatty acid composition of juvenile shrimp, *Litopenaeus vannamei*. *Aquacult Nutr*. 2007; 13(3):222–9.
23. Suprayudi MA, Takeuchi T, Hamasaki K. Essential fatty acids for larval mud crab *Scylla serrata*: implications of lack of the ability to bioconvert C18 unsaturated fatty acids to highly unsaturated fatty acids. *Aquaculture*. 2004; 231(1–4):403–16. PMID: [WOS:000189223600031](https://pubmed.ncbi.nlm.nih.gov/000189223600031/).
24. Gonzalez-Felix ML, Gatlin DM, Lawrence AL, Perez-Velazquez M. Effect of dietary phospholipid on essential fatty acid requirements and tissue lipid composition of *Litopenaeus vannamei* juveniles. *Aquaculture*. 2002; 207(1–2):151–67. PMID: [WOS:000175596600012](https://pubmed.ncbi.nlm.nih.gov/000175596600012/).
25. Li Y-y, Hu C-b, Zheng Y-j, Xia X-a, Xu W-j, Wang S-q, et al. The effects of dietary fatty acids on liver fatty acid composition and  $\Delta 6$ -desaturase expression differ with ambient salinities in *Siganus canaliculatus*. *Comparative Biochemistry and Physiology Part B: Biochemistry and Molecular Biology*. 2008; 151(2):183–90. doi: [10.1016/j.cbpb.2008.06.013](https://doi.org/10.1016/j.cbpb.2008.06.013) PMID: [18639644](https://pubmed.ncbi.nlm.nih.gov/18639644/)
26. Monroig Ó, Wang S, Zhang L, You C, Tocher DR, Li Y. Elongation of long-chain fatty acids in rabbitfish *Siganus canaliculatus*: Cloning, functional characterisation and tissue distribution of Elovl5- and Elovl4-like elongases. *Aquaculture*. 2012; 350–353:63–70. doi: [10.1016/j.aquaculture.2012.04.017](https://doi.org/10.1016/j.aquaculture.2012.04.017)
27. Li Y, Monroig O, Zhang L, Wang S, Zheng X, Dick JR, et al. Vertebrate fatty acyl desaturase with  $\Delta 4$  activity. *Proceedings of the National Academy of Sciences of the United States of America*. 2010; 107(39):16840–5. doi: [10.1073/pnas.1008429107](https://doi.org/10.1073/pnas.1008429107) PMID: [20826444](https://pubmed.ncbi.nlm.nih.gov/20826444/)
28. Smith S, Bernatchez L, Beheregaray LB. RNA-seq analysis reveals extensive transcriptional plasticity to temperature stress in a freshwater fish species. *Bmc Genomics*. 2013; 14. PMID: [WOS:000320173500001](https://pubmed.ncbi.nlm.nih.gov/000320173500001/).
29. Xia JH, Liu P, Liu F, Lin G, Sun F, Tu RJ, et al. Analysis of Stress-Responsive Transcriptome in the Intestine of Asian Seabass (*Lates calcarifer*) using RNA-Seq. *DNA Res*. 2013; 20(5):449–60. PMID: [WOS:000330167500003](https://pubmed.ncbi.nlm.nih.gov/000330167500003/). doi: [10.1093/dnares/dst022](https://doi.org/10.1093/dnares/dst022)
30. Xu J, Ji PF, Wang BS, Zhao L, Wang J, Zhao ZX, et al. Transcriptome Sequencing and Analysis of Wild Amur Ide (*Leuciscus waleckii*) Inhabiting an Extreme Alkaline-Saline Lake Reveals Insights into Stress Adaptation. *Plos One*. 2013; 8(4). PMID: [WOS:000316930900024](https://pubmed.ncbi.nlm.nih.gov/000316930900024/).
31. Li E, Wang S, Li C, Wang X, Chen K, Chen L. Transcriptome sequencing revealed the genes and pathways involved in salinity stress of Chinese mitten crab, *Eriocheir sinensis*. *Physiol Genomics*. 2014; 46(5):177–90. doi: [10.1152/physiolgenomics.00191.2013](https://doi.org/10.1152/physiolgenomics.00191.2013) PMID: [24423969](https://pubmed.ncbi.nlm.nih.gov/24423969/)
32. Li C, Zhang Y, Wang R, Lu J, Nandi S, Mohanty S, et al. RNA-seq analysis of mucosal immune responses reveals signatures of intestinal barrier disruption and pathogen entry following *Edwardsiella ictaluri* infection in channel catfish, *Ictalurus punctatus*. *Fish & Shellfish Immunology*. 2012; 32(5):816–27. doi: <http://dx.doi.org/10.1016/j.fsi.2012.02.004>
33. Salem M, Vallejo RL, Leeds TD, Palti Y, Liu S, Sabbagh A, et al. RNA-Seq identifies SNP markers for growth traits in rainbow trout. *PLoS One*. 2012; 7(5):e36264. doi: [10.1371/journal.pone.0036264](https://doi.org/10.1371/journal.pone.0036264) PMID: [22574143](https://pubmed.ncbi.nlm.nih.gov/22574143/)
34. Wang R, Li C, Stoeckel J, Moyer G, Liu Z, Peatman E. Rapid development of molecular resources for a freshwater mussel, *Villosa lienosa* (*Bivalvia*: Unionidae), using an RNA-seq-based approach. *Freshwater Science*. 2012; 31(3):695–708.

35. Chen K, Li E, Li T, Xu C, Wang X, Lin H, et al. Transcriptome and Molecular Pathway Analysis of the Hepatopancreas in the Pacific White Shrimp *Litopenaeus vannamei* under Chronic Low-Salinity Stress. PLoS One. 2015; 10(7):e0131503. doi: [10.1371/journal.pone.0131503](https://doi.org/10.1371/journal.pone.0131503) PMID: [26147449](https://pubmed.ncbi.nlm.nih.gov/26147449/); PubMed Central PMCID: PMC4492601.
36. Zeng D, Chen X, Xie D, Zhao Y, Yang C, Li Y, et al. Transcriptome analysis of pacific white shrimp (*Litopenaeus vannamei*) hepatopancreas in response to Taura Syndrome Virus (TSV) experimental infection. PloS one. 2013; 8(2):e57515. doi: [10.1371/journal.pone.0057515](https://doi.org/10.1371/journal.pone.0057515) PMID: [23469011](https://pubmed.ncbi.nlm.nih.gov/23469011/)
37. Clavero-Salas A, Sotelo-Mundo RR, Gollas-Galván T, Hernández-López J, Peregrino-Uriarte AB, Muhlia-Almazán A, et al. Transcriptome analysis of gills from the white shrimp *Litopenaeus vannamei* infected with White Spot Syndrome Virus. Fish & Shellfish Immunology. 2007; 23(2):459–72. doi: <http://dx.doi.org/10.1016/j.fsi.2007.01.010>
38. Chen K, Li E, Xu C, Wang X, Lin H, Qin JG, et al. Evaluation of different lipid sources in diet of pacific white shrimp *Litopenaeus vannamei* at low salinity. Aquaculture Reports. 2015; 2:163–8. doi: <http://dx.doi.org/10.1016/j.aqrep.2015.10.003>
39. Grabherr MG, Haas BJ, Yassour M, Levin JZ, Thompson DA, Amit I, et al. Full-length transcriptome assembly from RNA-Seq data without a reference genome. Nat Biotechnol. 2011; 29(7):644–U130. PMID: [WOS:000292595200023](https://pubmed.ncbi.nlm.nih.gov/200292595200023/). doi: [10.1038/nbt.1883](https://doi.org/10.1038/nbt.1883)
40. Conesa A, Gotz S, Garcia-Gomez JM, Terol J, Talon M, Robles M. Blast2GO: a universal tool for annotation, visualization and analysis in functional genomics research. Bioinformatics. 2005; 21(18):3674–6. PMID: [WOS:000231694600016](https://pubmed.ncbi.nlm.nih.gov/1500231694600016/).
41. Kanehisa M, Goto S. KEGG: Kyoto Encyclopedia of Genes and Genomes. Nucleic Acids Res. 2000; 28(1):27–30. PMID: [WOS:000084896300007](https://pubmed.ncbi.nlm.nih.gov/1000084896300007/).
42. Li B, Dewey CN. RSEM: accurate transcript quantification from RNA-Seq data with or without a reference genome. Bmc Bioinformatics. 2011; 12. PMID: [WOS:000294361700001](https://pubmed.ncbi.nlm.nih.gov/2000294361700001/).
43. Robinson MD, McCarthy DJ, Smyth GK. edgeR: a Bioconductor package for differential expression analysis of digital gene expression data. Bioinformatics. 2010; 26(1):139–40. PMID: [WOS:000273116100025](https://pubmed.ncbi.nlm.nih.gov/2000273116100025/). doi: [10.1093/bioinformatics/btp616](https://doi.org/10.1093/bioinformatics/btp616)
44. Xie C, Mao XZ, Huang JJ, Ding Y, Wu JM, Dong S, et al. KOBAS 2.0: a web server for annotation and identification of enriched pathways and diseases. Nucleic Acids Res. 2011; 39:W316–W22. PMID: [WOS:000292325300051](https://pubmed.ncbi.nlm.nih.gov/2000292325300051/). doi: [10.1093/nar/gkr483](https://doi.org/10.1093/nar/gkr483)
45. Pfaffl MW, Horgan GW, Dempfle L. Relative expression software tool (REST (c)) for group-wise comparison and statistical analysis of relative expression results in real-time PCR. Nucleic Acids Res. 2002; 30(9). PMID: [WOS:000175591100030](https://pubmed.ncbi.nlm.nih.gov/12000175591100030/).
46. Pequeux A. Osmotic regulation in crustaceans. Journal of Crustacean Biology. 1995:1–60.
47. Charmantier G, Charmantier-Daures M, Towle D. Osmotic and ionic regulation in aquatic arthropods. Osmotic and Ionic Regulation Cells and Animals CRC press, Boca Raton, FL, New York, NY, Oxford, UK. 2009:165–230.
48. Romano N, Zeng CS. Osmoregulation in decapod crustaceans: implications to aquaculture productivity, methods for potential improvement and interactions with elevated ammonia exposure. Aquaculture. 2012; 334:12–23. PMID: [WOS:000301693600002](https://pubmed.ncbi.nlm.nih.gov/2000301693600002/).
49. Lemos D, Phan VN, Alvarez G. Growth, oxygen consumption, ammonia-N excretion, biochemical composition and energy content of *Farfantepenaeus paulensis* Perez-Farfante (Crustacea, Decapoda, Penaeidae) early postlarvae in different salinities. Journal of experimental marine biology and ecology. 2001; 261(1):55–74. PMID: [11438105](https://pubmed.ncbi.nlm.nih.gov/11438105/).
50. Luvizotto-santos R, Bianchini A. Lipids as energy source during salinity acclimation in the euryhaline crab *Chasmagnathus granulata* dana, 1851 (crustacea-grapsidae). Journal of Experimental Zoology Part A: Comparative Experimental Biology. 2003; 295(2):200–5.
51. Deering MJ, Fielder DR, Hewitt DR. Growth and fatty acid composition of juvenile leader prawns, *Penaeus monodon*, fed different lipids. Aquaculture. 1997; 151(1–4):131–41. doi: [http://dx.doi.org/10.1016/S0044-8486\(96\)01480-9](http://dx.doi.org/10.1016/S0044-8486(96)01480-9)
52. Toussant MJ, Wilson MD, Clarke SD. Coordinate suppression of liver acetyl-CoA carboxylase and fatty acid synthetase by polyunsaturated fat. The Journal of nutrition. 1981; 111(1):146–53. PMID: [6109007](https://pubmed.ncbi.nlm.nih.gov/6109007/)
53. Jump DB, Clarke SD, Thelen A, Liimatta M. Coordinate regulation of glycolytic and lipogenic gene expression by polyunsaturated fatty acids. J Lipid Res. 1994; 35(6):1076–84. PMID: [8077846](https://pubmed.ncbi.nlm.nih.gov/8077846/)
54. Goepfert S, Poirier Y.  $\beta$ -Oxidation in fatty acid degradation and beyond. Current Opinion in Plant Biology. 2007; 10(3):245–51. doi: <http://dx.doi.org/10.1016/j.pbi.2007.04.007> PMID: [17434787](https://pubmed.ncbi.nlm.nih.gov/17434787/)
55. Schriener JE, Yi W, Hofmann SL. cDNA and genomic cloning of human palmitoyl-protein thioesterase (PPT), the enzyme defective in infantile neuronal ceroid lipofuscinosis. Genomics. 1996; 34(3):317–22. PMID: [8786130](https://pubmed.ncbi.nlm.nih.gov/8786130/)

56. Barger PM, Kelly DP. PPAR Signaling in the Control of Cardiac Energy Metabolism. *Trends in Cardiovascular Medicine*. 2000; 10(6):238–45. doi: [http://dx.doi.org/10.1016/S1050-1738\(00\)00077-3](http://dx.doi.org/10.1016/S1050-1738(00)00077-3) PMID: [11282301](https://pubmed.ncbi.nlm.nih.gov/11282301/)
57. Gulick T, Cresci S, Caira T, Moore DD, Kelly DP. The peroxisome proliferator-activated receptor regulates mitochondrial fatty acid oxidative enzyme gene expression. *Proceedings of the National Academy of Sciences*. 1994; 91(23):11012–6.
58. Freire CA, Onken H, McNamara JC. A structure-function analysis of ion transport in crustacean gills and excretory organs. *Comp Biochem Phys A*. 2008; 151(3):272–304. PMID: [WOS:000260665000002](https://pubmed.ncbi.nlm.nih.gov/153260665000002/).
59. Rainbow PS, Black WH. Effects of changes in salinity on the apparent water permeability of three crab species: *Carcinus maenas*, *Eriocheir sinensis* and *Necora puber*. *Journal of Experimental Marine Biology and Ecology*. 2001; 264(1):1–13. PMID: [WOS:000170924600001](https://pubmed.ncbi.nlm.nih.gov/170924600001/).
60. Martins TG, Cavalli RO, Martino RC, Rezende CE, Wasielesky W Jr. Larviculture output and stress tolerance of *Farfantepenaeus paulensis* postlarvae fed *Artemia* containing different fatty acids. *Aquaculture*. 2006; 252(2):525–33.
61. Sui L, Wille M, Cheng Y, Sorgeloos P. The effect of dietary n-3 HUFA levels and DHA/EPA ratios on growth, survival and osmotic stress tolerance of Chinese mitten crab *Eriocheir sinensis* larvae. *Aquaculture*. 2007; 273(1):139–50. doi: <http://dx.doi.org/10.1016/j.aquaculture.2007.09.016>
62. Palacios E, Bonilla A, Luna D, Racotta IS. Survival, Na<sup>+</sup>/K<sup>+</sup>-ATPase and lipid responses to salinity challenge in fed and starved white pacific shrimp (*Litopenaeus vannamei*) postlarvae. *Aquaculture*. 2004; 234(1–4):497–511. doi: <http://dx.doi.org/10.1016/j.aquaculture.2003.12.001>
63. Sargent J, Bell J, Bell M, Henderson R, Tocher D. Requirement criteria for essential fatty acids. *Journal of applied Ichthyology*. 1995; 11(3–4):183–98.
64. Brosche T, Platt D. The biological significance of plasmalogens in defense against oxidative damage. *Experimental gerontology*. 1998; 33(5):363–9. PMID: [9762517](https://pubmed.ncbi.nlm.nih.gov/9762517/)
65. Van Anholt RD, Spanings FA, Koven WM, Nixon O, Wendelaar Bonga SE. Arachidonic acid reduces the stress response of gilthead seabream *Sparus aurata* L. *The Journal of experimental biology*. 2004; 207(Pt 19):3419–30. doi: [10.1242/jeb.01166](https://doi.org/10.1242/jeb.01166) PMID: [15326218](https://pubmed.ncbi.nlm.nih.gov/15326218/).
66. Wang Y, Li E, Yu N, Wang X, Cai C, Tang B, et al. Characterization and expression of glutamate dehydrogenase in response to acute salinity stress in the Chinese mitten crab, *Eriocheir sinensis*. *PLoS One*. 2012; 7(5):e37316. doi: [10.1371/journal.pone.0037316](https://doi.org/10.1371/journal.pone.0037316) PMID: [22615974](https://pubmed.ncbi.nlm.nih.gov/22615974/); PubMed Central PMCID: PMC3355100.
67. McNamara JC, Rosa JC, Greene LJ, Augusto A. Free amino acid pools as effectors of osmotic adjustment in different tissues of the freshwater shrimp *Macrobrachium olfersii* (Crustacea, Decapoda) during long-term salinity acclimation. *Marine and Freshwater Behaviour and Physiology*. 2004; 37(3):193–208.
68. Schwer B, Bunkenborg J, Verdin RO, Andersen JS, Verdin E. Reversible lysine acetylation controls the activity of the mitochondrial enzyme acetyl-CoA synthetase 2. *Proceedings of the National Academy of Sciences*. 2006; 103(27):10224–9.
69. Starai V, Celic I, Cole R, Boeke J, Escalante-Semerena J. Sir2-dependent activation of acetyl-CoA synthetase by deacetylation of active lysine. *Science*. 2002; 298(5602):2390–2. PMID: [12493915](https://pubmed.ncbi.nlm.nih.gov/12493915/)
70. Ranallo R, Rhodes E. Lipid Metabolism During Exercise. *Sports Med*. 1998; 26(1):29–42. doi: [10.2165/00007256-199826010-00003](https://doi.org/10.2165/00007256-199826010-00003) PMID: [9739539](https://pubmed.ncbi.nlm.nih.gov/9739539/)
71. Bradbury MW. Lipid Metabolism and Liver Inflammation. I. Hepatic fatty acid uptake: possible role in steatosis 2006 2006-02-01 00:00:00. G194-G8 p.
72. Birukawa N, Ando H, Goto M, Kanda N, Pastene LA, Nakatsuji H, et al. Plasma and urine levels of electrolytes, urea and steroid hormones involved in osmoregulation of cetaceans. *Zool Sci*. 2005; 22(11):1245–57. PMID: [WOS:000237653000008](https://pubmed.ncbi.nlm.nih.gov/153260665000008/).
73. Frye C. Steroids, reproductive endocrine function, and affect. A review. *Minerva ginecologica*. 2009; 61(6):541–62. PMID: [19942840](https://pubmed.ncbi.nlm.nih.gov/19942840/)
74. Funder JW, Krozowski Z, Myles K, Sato A, Sheppard KE, Young M. Mineralocorticoid receptors, salt, and hypertension. *Recent progress in hormone research*. 1996; 52:247–60; discussion 61–2.
75. Gupta B, Lalchandama K. Molecular mechanisms of glucocorticoid action. *CURRENT SCIENCE-BANGALORE*. 2002; 83(9):1103–11.
76. Soderquist CA, Zeiher EK. Method for inhibiting scale formation and/or dispersing iron in reverse osmosis systems. Google Patents; 1994.
77. Metzler-Zebeli B, Eklund M, Mosenthin R. Impact of osmoregulatory and methyl donor functions of betaine on intestinal health and performance in poultry. *World's Poultry Science Journal*. 2009; 65(03):419–42.

78. Kim JK, Bamba T, Harada K, Fukusaki E, Kobayashi A. Time-course metabolic profiling in *Arabidopsis thaliana* cell cultures after salt stress treatment. *Journal of Experimental Botany*. 2007; 58(3):415–24. PMID: [17118972](#)
79. Capdevila JH, Falck JR, Harris RC. Cytochrome P450 and arachidonic acid bioactivation: molecular and functional properties of the arachidonate monooxygenase. *J Lipid Res*. 2000; 41(2):163–81. PMID: [WOS:000085510200001](#).
80. Kroetz DL, Zeldin DC. Cytochrome P450 pathways of arachidonic acid metabolism. *Current opinion in lipidology*. 2002; 13(3):273–83. PMID: [12045397](#)
81. Hardwick JP. Cytochrome P450 omega hydroxylase (CYP4) function in fatty acid metabolism and metabolic diseases. *Biochemical pharmacology*. 2008; 75(12):2263–75. doi: [10.1016/j.bcp.2008.03.004](#) PMID: [18433732](#)
